# Supplementary material for: Ectopic Expression of Plasmodium vivax vir Genes in P. falciparum Affects Cytoadhesion via Increased Expression of Specific var Genes
Source: MDPI journal article supplement (doi:10.3390/microorganisms10061183), 2022-06-09
Supplement: s1 [file s1]

# PVX\_050690

|       |                                                                         |
|-------|-------------------------------------------------------------------------|
|       | M P E S V T L N E I F A R T N I N E V D K                               |
| 1.    | GGTACCATGGCCAGAAAGTGAACCTTTAAATGAAATATTTGCTAGAACAAATATTAATGAAGTAGATAAA  |
|       | K R Y D S A F S E L L R H I N H G H V F F N Y                           |
| 70.   | AAAAGATATGATGATGCTTTTAGTGAATTATTAAGACATATTAATCATGGACATGATTTTTTAATTAT    |
|       | N K E G C W Y I S Y I L H K E V E E I L G Q Y                           |
| 139.  | AATAAAGAAGGATGTTGGTATATTAGTTATATATTACATAAAGAAGTTGAAGAAATATTAGGACAATAT   |
|       | Y N S Y A Y D L L K Q F V F K F N E N R S I R                           |
| 208.  | TATAATAGTTATGCATATGATTTATTAACAATTTGTTTTAAATTTAATGAAAAATAGAAGTATAAGA     |
|       | S D I C K K D Y V Y I N S D T Y K I M N G L Y                           |
| 277.  | TCAGATATATGTAAAAAGATTATGTATATTAATAGTGATACTTATAAAATTATGAATGGATTATAT      |
|       | N L Y D E Y T K Y K P I H D N T I P K N C C F                           |
| 346.  | AATTTATATGATGAATATACAAAATATAAACCTATTATGATATAACAATACCAAAAAATTGTTGTTTT    |
|       | L Y E N I K H F D T E I R K T I L K Y K I Y E                           |
| 415.  | TTATATGAAAATATTAACATTTTGATACAGAAATTAGAAAAACAATATTAATAATATAAAATATATGAA   |
|       | C R E Y P Y E V G K L N L Y T P P E P E K T I                           |
| 484.  | TGTAGAGAAATATCCATATGAAGTTGGAAAAATTAATTTATATACACCACCAGAACCGAAAAACAATT    |
|       | A P V P V E Q Q Q A P N V L Q N S H H E V T H                           |
| 553.  | GCACCAGTACCAAGTAGAACCAACAGCACCAATGTATTACAAAATTCACATCATGAAGTAACACAT      |
|       | H P V T A V D K V R K V E A E Q E Q G T A H D                           |
| 622.  | CATCCAGTAACAGCAGTTGATAAAGTTAGAAAAGTAGAAGCTGAACCAAGAACCAAGGTAATGCACATGAT |
|       | Q E I A R D Y V N S P E H G R V F K P E G V H                           |
| 691.  | CAAGAAATAGCAAGAGATTATGTTAATAGTCCAGAACATGGAAGAGTTTTAAACCTGAAGGTGTTTAT    |
|       | N A E R S R E H G I S H G Y R S T Y N H R G E                           |
| 760.  | AATGCAGAAAGATCAAGAGAACATGGTATAAGTCATGGATATAGAAGTACTTATAATCATAGAGGTGAA   |
|       | E K T F R R P G L S P Y P Q A F A T H D S S V K                         |
| 829.  | GAAAAAAGTTTAGCCAGGATTAAGTCCATATCCACAAGCTTTTGCTACACATGATAGTAGTAAAA       |
|       | Q E L T D V S S F S Q K S E P Q K E D E G F M                           |
| 898.  | CAAGAATTAACAGATGTATCAAGTTTTAGTCAAAAAAGTGAACCAAAAAAGAAGTGAAGGTTTTATG     |
|       | A N M R N T I T G V L G E V D P V P V V G V S                           |
| 967.  | GCAAAATATGAGAAATACAATTACTGGTGTATTAGGTGAAGTTGATCCAGTCCAGTAGTTGGAGTTAGT   |
|       | G G M G A L F L L F R Y T P V G A F F R G G R                           |
| 1036. | GGTGAATGGGAGCATTATTTTTATTATTAGATATACACCTGTTGGAGCATTTTTTAGAGGTGGAAGA     |
|       | G R V H R I P R S F N G P F P G G F P G F E E                           |
| 1105. | GGAAGAGTTCATAGATACTAGAAAGTTTTAATGGACCATTTCCTGGTGGATTTCCAGGATTTGAAGAA    |
|       | Y E S G V I G Y G P M N P L A E                                         |
| 1174. | TATGAATCAGGATATATTGGATATGGTCCAATTGAATCCATTAGCAGAACTAGG                  |

# PVX\_060690

|       |                                                                         |
|-------|-------------------------------------------------------------------------|
|       | M G S I T I N I Y D K D Q T L D S Q E C L                               |
| 1.    | GGTACCATGGGAAGTATAACTATAAATATATATGATAAAGATCAAAACATTAGATAGTCAAGAATGTTTA  |
|       | E R Y F E I L E N I Q G G S I A E F E R K E Y A                         |
| 70.   | GAAAGATATTTTGAATATTTAGAAAAATTTCAAGGATCAATAGCAGAATTTGAAAGAAAAAGATATGCA   |
|       | D F N K D W E E L I K Y I N E Q K K K L K I C                           |
| 139.  | GATTTTAAATAAGAGTTGGGAAGAATTAATTAATATATTAATGAACAAAAAATAAATTAATTTGT       |
|       | Y D R N L L E I H L N S D A D I S G F Y R K C                           |
| 208.  | TATGATAGAAATTTATAGAAATTCATTTAAATAGTGATGCAGATATATCAGGATTTTATAGAAATGT     |
|       | N A N P K L N Y I S P Q D K K K L T E L K D D                           |
| 277.  | AATGCAAAATCCAAAATGTTTAAATATATATTAGTCCACAAGATAAAAAATTAACAGAATTAAGAGATGAT |
|       | T E T S C E G R N C G K K V K A A K G K T G V                           |
| 346.  | ACAGAAACAAGTTGTGAAGGTAGAAATTTGTGAAAAAAGTAAAGCAGCAAAAGGTAAAAACAGGTGTA    |
|       | K T P Q L N E K G S V M K T L E T Q K S Q G Q                           |
| 415.  | AAAACACCACAATTAATGAAAAAGGATCAGTAATGAAAACCTTTAGAAACACAAAAAGTCAAGGACAA    |
|       | G E N H V D G G K E P R Q E G V I S Q D H P H V                         |
| 484.  | GGTGAATATCATGATAGATGGAAGAACCTAGACAAAGAACCAAGTTATAAGTCAAGATCATCCACATGTT  |
|       | I S L R P S V T E P K S D G S E P K L D H H S N                         |
| 553.  | ATAAGTTTAAAGCACAAGTGTAGAACCTAAAAGTGATGGAAGTGAACCTAAATTTAGATCATATAGTAAT  |
|       | P H I P I D N P T Q R L G I A P Q P T H R A L                           |
| 622.  | CCACATATACCAATAGATAATCCAACACAAAGATTAGGAATAGCACCACAACCTACACATAGAGCATTAA  |
|       | D S N P S D S S L Q N S S E G D S P S I G T S                           |
| 691.  | GATTCAAATCCAAGTGATAGTTTACAAAATTCAAAGTGAAGGTGATAGTCCAAAGTATAGGAACAAGT    |
|       | Q G K T P E T V A S Q R D T R N S Q T L N D N                           |
| 760.  | CAAGGTAAAACCTCCAGAAACAGTAGCAAGTCAAAGAGATACAAGAAATAGTCAAACTTTAAATGATAAT  |
|       | A H G K Q A V G S Q T Y E E H T S V D K D A V                           |
| 829.  | GCACATGGAAAAACAAGCAGTTGGAAGTCAAACATATGAAGAACATCTTCAGTAGATAAAGATGCAGTA   |
|       | V A S A T E N R D V G T S I S G N P G H R N P                           |
| 898.  | GTAGCTAGTGCAACAGAAAATAGAGATGTTGGTACAAGTATAAGTGGAAATCCAGGACATAGAAATCCA   |
|       | P P I V T D G A V D G S I S L P S V G A T G I                           |
| 967.  | CCAGCAATAGTAACAGATGGTGCAGTAGATGGTAGTATATCATTACCAAGTGTGGAGCAACTGGTATA    |
|       | K G T T E L S G H A I Y S V E C T T G S A L P                           |
| 1036. | AAAGGTACTACAGAATTTATCAGGACATGCAATATATTAGTGAAGTGTACAACAGGATCAGCATTACCT   |
|       | G E V D T T T K A A G N S P T D S K A A D E V L                         |
| 1105. | GGTGAAGTAGATACAACAAAGCAGCTGGAATAGTCCAACAGATAGTAAAGCAGCAGATGAAGTATTA     |
|       | G V E A K Q D K V P C S E N P C N N D S H Q V                           |
| 1174. | GGTGTAGAAGCAAAACAAGATAAAGTACCATGTAGTGAAGTCCCTTGTAAATAGTATAGTCATCAAGTT   |
|       | F S V G T L S C S E A L S N C Q K I Q G N R D S                         |
| 1243. | TTTAGTGTAGGTACAAGTTGTAGTGAAGCTTTAAGTAATTGTCAAAAAATCAAGGTAAATAGAGATAGT   |
|       | S A S V S N S A E L Q M D N S T Q S K P H T E                           |
| 1312. | AGTGCAAGTGTAGTAATAGTGCAGAATTACAAATGGATAATAGTACACAAAGTAAACCACATACAGAA    |
|       | Q E A S D D Q G N E L Q K E K T R T D R E S N Q                         |
| 1381. | CAAGAAGCTTCAGATCAAGGTAAATGAATTACAAAAAGAAAAACAAGAACAGATAGAGAAAGTAATCAA   |
|       | E V H S G K E H R S N M Q Q S Q T Q G G H E G                           |
| 1450. | GAAGTAGATTCTGGAAAAAGAACATAGAAGTAATATGCAACAAATCACAAACACAAGGTGGACATGAAGGA |
|       | S T E G L H H V N H E T S E G G K Q Y L Q D K                           |
| 1519. | TCAACTGAAGGATTACATCATGTAAATCATGAAACATCAGAAGGTGGAAAAACAATATTTACAAGATAAA  |
|       | H P Q P T T C V P T S T I N D G E T L V S S Q                           |
| 1588. | CATCCTCAACCTACACATGTGTTCCAACAAGTACTATAAATGATGGTGAACACATTAGTATCTAGTCAA   |
|       | S N R S G A G A T G E A V T T G S G N V L D I                           |
| 1657. | AGTAATAGAAGTGGTGGTGGCAACTGGTGAAGCAGTAACAACAGGTTCTGGAAATGTATTAGATATT     |
|       | F N R L F S N V P Y V D K E Y I M M A L V P L                           |
| 1726. | TTTAATAGATTATTTTCAAATGTACCATATGTGAGAAAAGAAATATATTATGATGGCATTAGTACCATTAA |
|       | A I I L L L T T F L I K F T P L G T F F T K K K                         |
| 1795. | GCTATTATATTGTTTAACTTTTAAATAAAATTTACACCATTAGGAACATTTTTTACAAAAA           |
|       | K K E Q K K M N E K L Q R V L S E Y P A Q M N                           |
| 1864. | AAGAAAGAACAAAAAATGAATGAAAAATTAACAAGAGTATTATCAGAATATCCAGCACAATGAAT       |
|       | E R N I P F S Y S P F A Y S T Q                                         |
| 1933. | GAAAGAAATATTCCTTTTAGTTATAGTCCATTTGCTTATTCAACACAACCTAGG                  |



## PVX\_093715

|       |                                                                             |
|-------|-----------------------------------------------------------------------------|
|       | M S H E P D Y E I F Q N L T E Y R K N E G                                   |
| 1.    | <b>GGTACC</b> ATGAGTCATGAACCAAGATTATGAAATTTTCAAATTTGACAGAATATAGAAAAATGAAGGT |
|       | L I D L K E Y T A E T S F C G D P K S P L K S                               |
| 70.   | TTAATAGATTTAAAAGAATATACAGCAGAAACAAGTTTTTGTGGTGATCAAAAAAGTCCTTTAAAAAGT       |
|       | N S G A V D I C K R F V I L F K R L N P S E G                               |
| 139.  | AATAGTGGTGCAGTAGATATATGTAAGAATTTGTTATATTATTTAAAGATTAAATCCAAGTGAAGGT         |
|       | T T A E R S D G H P A S S S I S S A T P K H A A                             |
| 208.  | ACAACAGCTGAAAGAAGTGATGGACATCCAGCAAGTAGTATAAGTAGTGCAACACCAAAACATGCAGCA       |
|       | F L N Y W L S T Q L R D K N I P E N L R P L L                               |
| 277.  | TTTTGAATTTATGGTTAAGTACACAATTAAGAGATAAGAATATTCAGAAAAATTTAAGACCATTATTA        |
|       | Y L H L K T H Y D K F K G K Y K L T D Q F H P                               |
| 346.  | TATTTACATTTAAAAACACATTATGATAAATTTAAAGGGAAATATAAATTAACAGATCAATTTTCATCCA      |
|       | I E S A H L E K L D I L H E L Y R Q Y Y E L K                               |
| 415.  | ATAGAAAGTGCACATTTAGAAAAATTAGATATATTACATGAATTATATAGACAAATATTATGAATAAAA       |
|       | N N K L G G G E K K E G D R D E G C L N F L Q                               |
| 484.  | AATAATAAATAGGTGGTGGTGAAGGGGATAGAGATGAAGGATGTTTAAATTTTTTACAA                 |
|       | N C K D N Y N K L E K C L P Q A D N Q F C I                                 |
| 553.  | AATTGTAAGATAATTATAATAAAGGATTAGAAAAATGTTTACCACAAGCAGATAATCAATTTTGTATA        |
|       | A L N R F R N L Y E E D K A S F S A A C H N K                               |
| 622.  | GCTTTAAATAGATTTAGAAATTTATATGAAGAAGATAAAGCAAGTTTTAGTGCAGCATGTCATAATAA        |
|       | T L P S L P E I A S L R L P K A V T G G T P K                               |
| 691.  | ACATTCCAAGTTTACCAGAAATAGCAAGTTTAAAGATTACCAAAAGCAGTAACAGGTGGAACCAAAAA        |
|       | I G G D L V Q A E Q S S S T H Q L P K I V D D                               |
| 760.  | ATTGGTGGTGATTTAGTACAAGCAGAACAAAGTAGTTCAACACATCAATTACCAAAAAATAGTAGATGAT      |
|       | V Y P N L Y K L L L L Q Y T S L F E Y D E E K                               |
| 829.  | GTATATCCAAATTTATATAAATTTATTATTACAATATACAAGTTTATTTGAATATGATGAAGAAAA          |
|       | I K N N L M E V L H E F L K Y Y N L N R G N S                               |
| 898.  | ATTAATAAATATTTAATGGAAGTTTACATGAATTTTTAAATATTATAATTTAAATAGAGGAAATAGT         |
|       | S V D L F I K E F F Y D Y Y K N K K E E Y E K                               |
| 967.  | TCAGTAGATTTTATTAAAGAATTTTCTATGATTATTATAAAAAATAAAAGAAAGATATGAAAA             |
|       | I Y A E C S N K K P L T S Y C K L Y Y R C N D                               |
| 1036. | ATATATGCAGATGTAGTATAAAAAACCATTAACAAGTTATTGTAATTTATATTATAGATGTAATGAT         |
|       | Q L R D D L F S I K E D V A K Y L G D K A K S                               |
| 1105. | CAATTAAGAGATGATTTATTTCTATAAAAGAAGATGTAGCTAAATATTTGGGTGATAAAGCAAAAAGT        |
|       | Y Q Q A C L S G N P P T E T E M H K I G R S S L                             |
| 1174. | TATCAACAAGCTTTAAGTGGAAATCCACCAACAGAAAACGAAATGCATAAAATTTGGAAGAAGTAGTTTA      |
|       | I S L H R F A I V S T V I G V F F F L F S I Y                               |
| 1243. | ATATCATTACATGATTTTGTATAGTTAGTACAGTAATTGGAGTATTTTTTTTTTATTTTCAATATAT         |
|       | E F T P L G C W F R R K F N K T K R V A Y N F                               |
| 1312. | GAATTTACACCATTAGGATGTTGGTTTGAAGAATAATTAATAAAACAAAAGAGTAGCTTATAATTTT         |
|       | Y M Q Q C I R Y I M E M N S P F E D V R L D S R                             |
| 1381. | TATATGCAACAATTAGATATATTATGAAATGAATAGTGCAATTTGAAGATGTTAGATTAGATAGTAGA        |
|       | E A N I G Y Q S T                                                           |
| 1450. | GAAGCAAATATTGGATATCAAAGTAC <b>CCTAGG</b>                                    |

## PVX\_101560

|       |                                                                                |
|-------|--------------------------------------------------------------------------------|
|       | M E E P C S E D L P S Q S F Y K S L G E Y                                      |
| 1.    | <b>GGTACC</b> ATGGAAGAACCATGTAGTGAAGATTTACCAAGTCAAAGTTTTTATAAATCATTAGGTGAATAT  |
|       | M Y S L D E Y D G Y C V L G N S N Y G H N E S                                  |
| 70.   | ATGTATAGTTTAGATGAATATGATCAATATTGTGTATTAGGAAATAGTAATTATCAACATAATGAATCA          |
|       | V K S L C R H L L K N L N H N S Q I N V N E S                                  |
| 139.  | GTAAAAAGTTTATGTAGACATTTATTAATAATTTGAATCATAATAGTCAAATAAATGTAATGAATCT            |
|       | V P C N H Y K L L S Y W L Y N Q I E K V F T P                                  |
| 208.  | GTACCATGTAATCATTATAAATTTAAGTTATTGGTTATATAATCAAAATAGAAAAAGTTTTTACACCA           |
|       | R F E E I E R K N I Y K E L T S I W K D F V S                                  |
| 277.  | AGATTTGAAGAAATAGAAAGAAAAAATTTTATAAAGAATTAAACAAGTATATGGAAGAGATTTTGTAGT          |
|       | S P F R N L N N C Q P E P V T V F D D D D D                                    |
| 346.  | AGTCCTTTTGAAGAATAATTAATAAATGTCAACCAGAACCAAGTAAACAGTATTTGATGATGATGATGAT         |
|       | N N N W K V R K E F Y E Y C E D Y N T L K K S                                  |
| 415.  | AATAAATTTGGAAGTTAGAAAAAGAAATTTTATGAATATTGTGAAGATTATAATCTTTAAAAAAGT             |
|       | C T H S F S T C G K Y Y D Y L E N K S D L Y N                                  |
| 484.  | TGTACACATAGTTTTAGTACATGTGGTAAATATTATGATTATTTAGAAAAATAAGAGTGATTATATAAT          |
|       | Q F L T L N L N K P Q D K Y S S S Y E K Y K K                                  |
| 553.  | CAATTCCTTAACCTTTAAATTTAAATAAACACCAAGATAAATATTCAGTAGTTATGAAAAATATAAAAA          |
|       | F D P R T L D N L P C T F E M S P D G K L E                                    |
| 622.  | TTTGATCCAAGAACATTTATAGATAATTTACCATGTACATTTGAAATGAGTCCAGATGGAAAAATTAGAA         |
|       | Y V K T R T T K L Y Q P R V Q P V A A S P Y R                                  |
| 691.  | TATGTAAAAACAAGAACAACAAATTTATATCAACCTAGAGTACAACCAAGTAGCAGCAAGTCCATATAGA         |
|       | V N Q E Q K I S S Q A S S H P E V S R Q K A S                                  |
| 760.  | GTAAATCAAGAACAAAAATTTCAAGTCAAGCAAGTAGTCATCCAGAAAGTTTCAAGACAAAAAGCTTCA          |
|       | R L K A S R L K A P R L K A P R L E A P R G A                                  |
| 829.  | AGATTTAAAGGCAAGTAGATTTAAAGCACCAAGATTAAAGCTCCTAGATTAGAAGCTCCAAGACAAGCA          |
|       | A Q Y Q A P P Y G T A P Y E A A L H K A A P R                                  |
| 898.  | GCACAATATCAAGCTCCACCATATCAACAGCACCATATGAAGCAGCATTACATAAAGCTGCACCAAGA           |
|       | K A D L H E E D P H E E N Q Y K A Y P Y Q A S                                  |
| 967.  | AAAGCAGATTTACATGAAGAAGATCCTCATGAAGAAAAATCAATATAAAGCTTATCCTTATCAAGCTTCA         |
|       | L Y R T T P H Q E A S Y G E Y L E P A G D D L                                  |
| 1036. | TTATATAGAACAACACCACATCAAGAAGCAAGTTATCAAGAATATTTAGAACCTGCTGGTGATGATTTA          |
|       | E T S T S P V D T E R A T I N L P L I A L S V                                  |
| 1105. | GAAACAAGTACAAGTCCA <b>GTGAC</b> ACAGAAAGAGCAACTATAAATTTACCTTTAATAGCATTAAAGTGTA |
|       | I L L L T L T I S F T I D F T S F G S W M M R R                                |
| 1174. | ATATTATTATTAAACAATATCCTTTACAATAGATTTTACAAGTTTTGGAAGTTGGATGATGAGAAGA            |
|       | A R R K R R R S T P R F N E Y Y R E P S Y N Y D                                |
| 1243. | GCTAGAAGAAAAAGAAGTAGACCTAGATTTAATGAATATTATAGAGAACCTAGTTATAATTATGAT             |
|       | S E Y T D S Y D L N S T R N I P Y Y P A                                        |
| 1312. | AGTGAATATACAGATTCATATGATTTAAATAGTACAAGAAATATTCATATTATCCAGCA <b>CCTAGG</b>      |

## PVX\_113230

```

1.  M E K D P K Y K D L P S Q I Y Y D K L N E
   GGTACCATGGAAAAAGATCCTAAATATAAGATTTACCAAGTCAAATATATTATGATAAATTAAATGAA
70. D I I E E E E D D E H E E E N E E S Q E N V Y Y W E
   GATATTATAGAAGAAGAGATGATGAACATGAAGAAAAATGAAGAATCACAAAGAAAAATGTATATTGGGAA
139. A I E G S Y E Q T P W V R D V F F K L E R N L
   GCAATAGAAGGATCATATGAACAAACACCATGGGTTAGAGATGTATTTTAAATTAGAAAGAAATTTA
208. T E I N E S R G E D S L S K K H C Y D L N Y W
   ACAGAAATAAATGAATCAAGAGGTGAAGATAGTTTAAAGTAAAAAACATTGTTATGATTAAATTTATTGG
277. L Y E Q V Y E N L N N N E N D E N F F K I I D
   TTATATGAACAAGTATATGAAAATTTAAATAATAATGAAAATGATGAAAATTTTTTTTAAATTTATAGAT
346. G L Q N A W T N I N N D K F P N A D N I C H P
   GGATTACAAAATGCATGGACAAATATTAATAATGATAAATTTCCAAATGCAGATAAATTTTGTATCCA
415. D K T L V D M K Y L K D V K H L F D F I E D F
   GATAAAACATTAGTAGATATGAAAATTTTAAAGATGTAACAACTTTATTGATTTTTATTGAAGATTTT
484. S T I K T A A I K D T N N A C Q K Y I D Y L K
   TCAGCATTAAGAACAGCAGCTATAAAGATACAAATAATGCATGTCAAAAATATATTGATTATTTAAAG
553. L K V P L Y Y E W N D V C T M E E E E N I C T K
   TTAAGATACCATATATTGAATGGAATGATGTATGTACAATGGAAGAGAAAAATTTTGTACTAAA
622. Y I D Q V Y N P K N V L E N L S V V S L A
   TATATTGATGATTATCCTAAATATAATCCAAAAATGTATTAGAAAAATTTAAGTGATGTTAGTTTAGCA
691. L A S I F N D C Y Q N I I N L F T E A E K I E
   TTAGCAAGTATTTTCAATGATTGTTATCAAATATTATTAATTTGTTTACAGAAGCAGAAAAAATTGAA
760. P R T V L K H R D I T G P S E S N V V K I G Q
   CCTAGAACAGTTTAAACATAGAGATATTACAGGACCAAGTGAAGTAAAGTAGTAAAAAATTTGGAGGT
829. R A L A E A I S D T S Q S G N M L I G I N A L
   AGAGCATTAAGCTGAAGCTATAAGTGATACAAGTCAAGTGAAGTGAAGTGAAGTGAAGTGAAGTGAAGT
898. A T S L F V D S V V K R F N S Y V F S L V A P
   GCTACAAGTTTATTTGTGACAGTGTGTAAGAAAGATTTAATAGTTATGTTTTAGTTTATAGTACCA
967. V G L L L G L L F L Y V L Y K F T P I G K
   GTAGGATTAAAGTTTATTAGGATTATTATTATTTTATATGTATTATATAAATTTACACCAATAGGAAAA
1036. S I S R T H K R V K N K F V R N K R D D F D D
   AGTATAAGTAGAACACATAAAAGAGTAAAAAATAAATTTGTTAGAAAAAAGAGATGATTTTGATGAT
1105. D E D D D D D D S D N S S D L K S S S S M E S
   GATGAAGATGATGATGATGATGATGATGATGATGATGATGATGATGATGATGATGATGATGATGATGAT
1174. L L S N S
   TTATTAAGTAATAGTCTAGG

```

## PVX\_115475

```

1.  M E E E D L D S K Y E N V P S Q I F Y K E
   GGTACCATGGAAGAAGAGGATTTGGACTCGAAATATGAGAACGTGCGCTCACAGATATTTTACAAAGAA
70. L N A E L K D R V N T Q W E K L K D L I E E Q
   CTGAATGCTGAATTGAAGGACAGGGTTAATACACAATGGGAAAAAGTTAAAGATTTAATAGAGAAGCAA
139. P L L K D V C D K L E K N L K S L N A N P Q S
   CCTTTACTTAAAGATGTTTTGCGACAAACTTGAAAAAATTTAAATCCTTAAACGCTAATCCTCAGTCA
208. E M L S K K H C Y D I N Y W L F D N V H N K L
   GAGATGTTAAGTAAAGAAGCATTGTTATGATATAAATTACTGGTTATTTGATAATGTACATAACAAGCTT
277. N I K E E D P L F Y N I I D S V H S V W R D I
   AATATTTAAAGAGGAGGACCCCTCTTTTTTATAACATTATCGATAGTGCCATAGTGATGGAGAGATATA
346. N E S L P D K T H I C K P D S T L M D M P V L
   AATGAGAGTTTGCCAGATAAAGACTCATATATGTAAACCAGATTCAACGTTAATGGACATGCCTGTTTTG
415. K E F K H L F D F I E N F A F F K A E A F K D
   AAGGAATTTAAGCATTGTTGATTGTTTATTTGAAAACTTTGCGTTTTTAAAGCAGAAGCTTTAAGGAT
484. T P K A C T K Y F K Y L E R S V Q I Y Y A R E
   ACTCCCAAGGCATGCACGAATATTTTAAATACCTTGAACGTAGTGCCAAATATATTATGCAAGGGAG
553. I F C T N P E S N M C N R Y I D N Y K S Y N P
   ATCTTTTGTACTAACCCAGAAAGTAATATGTGCAATAGATATATTGATAACTACAAATCTTATAATCCA
622. K N N V R E E L N V S K L I M G L V W Y Q C Y R
   AAAAAATGTTAGAGAAGAATTAAACGTGCTAAACTTATTATGGGTTTGTTTGGTATCAATGTTACAGA
691. D V V S L F R A V K K Q P Y R L E V K F R T V
   GATGTTGTAAGTTTATTTAGAGCTGTAAAAAACAGCCTTACCCTTTAGAAAGTAAATTCAGAACTGTC
760. Q G D V G T T V V V P D A I K E F F R A V Y S
   CAAGGGGATGTTGGAACAACTGTAGTGGTTCCCTGATGCGATAAAGAGTTCTTTTCGTGCAGTTTATTCT
829. V L K H I Y G I V Y F L I F L P V L F I L G P
   GTCTTGAACATATATATGGTATTGTGATTTTTTGTATTTCTGCCCCGTTCTTTTTATTTTGGGTCCA
898. Y V F F L L I Y K F T P L G R Q M L R A R A L
   TATGTCTTTTTTTATTAATATACAAGTTTACTCCACTCGGAAGACAAATGTTACGTGCCCGAGCACTA
967. L K K K L K T N I S Y E D I I L L N G S S E S
   CTAAGAAAAAATGAAAAACCAATAGTTTATGAGGACATCATATTGCTAAATGGAAGTTCCGAATCT
1036. I F S G S S S D S S Y I V G Y Q A S S Q S S S
   ATTTTATAGTGGTAGTTCATCGGATAGCTCATATATTGTAGGATACCAAGCTTCTTCCAGAGTAGTTCA
1105. G
   GGACCTAGG

```

## PVX\_068690

GGTACC

ATGAGTTTTAGAAATAGATGGAGTTATAATTATTGGCAACAATATGAAGGAGCAAGTTGTTATAATAATTATAGT  
ACATATAAAGAGAAATTGAAGAAAAATAGATAATTTATATAGAATAACAAATGGAAATTTTTATACACAATGG  
CATCAATTTAAATGAATATATTTAAAAAGAAAAATAATGAAATTAAAAATTGTGATAGAAATAAAGTACATTAGAT  
TTATTTAAAGATGATAATATTTAAAGATTTTCAACATTATGTAGTAATAGATTATCATGTAGAACAAAAACCAAGT  
TCATTAGTTAATAATCATGATAGTTTACAACCCAGGAAAAAATGCAACATGTAAAGGAGATTTCATGTCCACAAAAG  
AAAAACAAGAACAAAAAGTCCAGTTGCAAAATTACAATCATTACCACATACAGGTAGTTCAAATGCTAAAAGTTCA  
TTAAATCCAAAAACAATAAATCCAGTACAAGAACATCATGAAAGAAAAGGAAGTGAAACAACCATCAATTAGTTCA  
CAAGCTCATCAAGAACAAAAACATAGAGGTAGTTCAGTTCAAAACAGAAGGTGGAAGTCCAGAATCATTTAAAGTA  
CATAATACAGCAAAACCGAATTAGAACAAAGTTCAGCACAAAGTGCTTCAATACCAGCTCCAGTTACAACAACA  
GAAGTAATAACACATCAAATTAGTCATTCAACAGGAAGTAAAGCATCAGAAGAAAGTGATGCTAGTTCACCAGTT  
CAAGAAATTGATTTAAAGGTAGTAATCATCAATCAGGAACAAGTGCAGGTCAAACAAGTGATGATAATTTACCA  
AATTTACAATCAATAAATGGAATTACAGATGCTAATCAAGATCCAAATAATCAAATATTTAGAGTTGAAATAGAA  
TATGTTAGTGATGAAATCCACCAGGAACATCAACAGGTGATGTAAGTTCAAGTTCAACAGATACAGCATGTGCT  
GATACAGATAAAACAAATATACATCATGCAACAACATGTAATAAACTTATAGTGGAATACCAACAAATCCAGAA  
ACATCAGGTGATGAAGCTACACCAGATGAATTAGTTAGAGGAGAAGGTGCAGTTGTAGCTGATGTTAGAAGTGAA  
ACAAATGGAACAGAAGATGCAGAAAAATGGTCCATCAGTTAGAGAAAAACAGATGTTATTGTATTTAGTGATAAT  
GGAGTAGATCATAAATCATTTTGTTTAGAAGATGCTGAAAATCCAACACATGAAAATGGAATACCATGTATTGCA  
GAAAAAGGTACAGAAATTGATGCTAATAATGGAATATTTTAGGTACATTAGAGAAATTTTCTATGAAATACAA  
AATAATCCACATATAATTAACAAGTATACCAATTGGTATTATATTTTGTAAACATTATTATTTAAATATACA  
CCATTATGGAGAATATTACTAAAAAGAAAAAGAAAGAACCGTTGATATGAATGAAGAATTACATTCAGTATTA  
CAAGAACCATTAAATTATGGATGATGAAAGATCAATACCTTTTAGTTATGGAGCATTGGAATATAGTACATTTGAT  
GAAAAACTTAT

CCTAGG

## PVX\_077695

GGTACC

ATGGAAAAAGCATTATTAAGTTTACAATCAAAAAGAAATGCAGTTATAGCAATAGAATATAAAAAATTAGATGAT  
TTAGATATTAAAGATTATTCAGATAATTATTGTGAAAAAGATTTAGGTAGTCCAAAGAAAGAAGATAAAGAATTA  
TGTAATAAAGTATCAAACATTTAAAAAGATTAAGTGGTATATCAAATAATGATGATAGAAAACATGGATGTTTT  
TATTTTCAATATTGGTTTTATGATCAAATAAGTAAAAAATATTCAAGCTGATGATAAAATTAATAATAACAAGTA  
TCAGATAAATTGTTTGATTGTTGCAACAACAATTTAAAAAGTCCAAATTTAGAACCATGTAGATGTTATGAA  
AGTGGTACACCATCAATATGGAAAGAAAGAAAGATTACATGATTATTTAAAAATTATAAAGATATAAATTGT  
ACAAATTAGATAAAACAACATGTGAAAAATATGTTAGATATGTAACATATATAGATAAATTGTTTCAAAATAAA  
GAAGATACATGTTGTTATGATGAAGATGTAGAAAAGTTTTGTGAACATTATATAAATTGTAATAATAAATATAGA  
CCAGATGGATTATTAACAAAATTACAAACAGAATTAAAAGCATTAGATGCAAAAGTTAAAGAAGTACCAAAAGCT  
GTTGGAGGTGAAGATGCTCCAGGTGCAGTTGTAGAAAATAAAGCAGCTGGAAGTGATGGTCCAGGATCAGAAAAG  
AAAGCACCAGGTATAGCTGGAGCAGAAGAAGCTAAACAATTACCTGCAAAACAGTAGCAGCTAAACCAGTTGGT  
GAAGATCCACCAGCAGCTGAACCATTAGCAGCTAAACCAGCAGCTGCAAAACAGTAGCAGCAGAAAGTGGAGGA  
TTACCACCAGAAGTAGCTAAACCACCAGCAACAGTTAGTGGAGGTACAGAAAGTGGAGGAACAGAAAGTGGAGGT  
GGAAAACCAGCAGAAGTAAACCAGAAGTTGTAAACAAGAAACAGTTGGACCAGCTGAACAAGAAGCACCACCA  
CCACCACCAGCTCCAAGAGAGAACAGTTCAACAACAACCAGCACCATTAGAACCAAAAGAAAGTTTAGATGAAGAA  
GAAGTTGCTGAAGTAACAGAAGATGGTGTGATGAAGTAGATGAAGTTGCAGAAGAAGGTGAACCAGGACAATTA  
GAAGGAGAAGCAGCAGTTATATTACAAGATACAGCTACATTTAGTGCACCATCATTAGAAGATTCAGGTGCAGCA  
GTTTCATGCTGCACCATATTATACACCAGAATTAGCTGGTAATGGAGCACCATTAAACAAATAGTGAAGCACCATCA  
ACATTAAGAACAACACATGAAGAATTAGATAGTAATTTCTTTAGAAATGTAATTATGGCTATAGCAGTTTTAGGA  
ACAATATGTTTCTTATTTTATTATAATAGAAGTTCAAGATTAGAACCAAATAGTAGAAAGAAAAAGAAAAAGAA  
GGAAAAATATTGGAACATAATTATTATGAAGAATATGAAAAAGAATTAGAAATGTATGGAAGTGAAGAAACATTT  
ATAGATTCCAGAAACAGATAGATTATTTAAATTATCATCCAGATCAAGATAGTTATTAT

CCTAGG



## PVX\_081850

GGTACC

ATGGCACAAAATATAGTAGATCAAGCATTATCAGTATTAAAAGAAGGAAATTATACAGTAAGAGCAGCAACTAAA  
TTAATATTCTTTTATGATATTTTGGATACAGATTTTGATAATTTTATAAAATTAAATTGTGTAATGGATGTGAT  
AAAAATAAATATTTATTTGATAGTTTAAAGAAAAACAATAAAACAATAATTGAAGAATGGGAAAGTTTATTAGAT  
TTCTTTAGATGTGAACAGCAGGAGATGAAAATACATGTTGTTTAAATTTTATATATTGGATTTATGGTAAAAATA  
AAAGATAGTAATTTAAATGTTGATTATATAAAAGAAATTTATAATAATTTAGATGAATTTGTAAAAACAAAATTGT  
TTTGGTTATGATGCAGAAAAACCAGAAAAATTTTCAAAAAATATGTTAAAGCCTATGATAAGAAAAGTTTAAAA  
AGAAAAGAAAGAATTATATGATTTTGTTCATTTTATGAAAAGAGTAAAAAGTAAATTGGATGCTGTTCAATCAAAA  
AGAAAAGTAATGTGTGATTATATTAGTTATATATTTAAAAATGTATGAAGAAATGAGAAGAGATTGTAGTTCAATT  
AAATCAGAATGGTATGAAGATGAAATGAAAAATTTTATTGAAATGTTAAAGAAAAATAATGAATTAACATTATTA  
GAAAGTAAATGTGGAGATATTACAAAAGGTTTAAATTTAGATGATAATATTGAAGCATTATGTCCATCAAAATAAT  
GAAAGTGCAGCTAGTAAGAAAAGGCACAAATATTAAGAAAGTCCACAAGAAGAAGAAAAATTTAATTTATCAGCTGTT  
CCAAAAGTAAATATGCAAAGTGATGTTTCAAATCAATTACCTAGTAAGAAAAATATGTGAAGAAATGGATAAAAAAT  
AATAATCCAGATTTAAATATTACAGATTGTAATGTATTTAAAGATCAAATTTGGTAAATCATTATGTGCACATACA  
ATTAATAATTTTAAAGAAAAATAATAAAATTTGAAGATAGAGAACAACATAATGATTATTGTTTACATTTTATGTAT  
TGGTTATATGGAAAAATTGGTGAAAAATTATATAAAATAAAAGTTCAAATATTTTAGAAGATCCAGAAATAAGTAAA  
TTTGTTCAATTTAATGTATCATTAAATAATAAAAGTTCAAATATTTATTGTTATTATAATAGTGAAAAATAATTTA  
GAAGAATGGAAGAAATAAATGATTTAATAGATTATTTTAAATACATAATAATATTGATAATACAAAATCATGT  
GATGATAATGCATGTGCTAAAAATTTGTGAATATTTTAGTAATATATCAAATTTATATAAAAGACATAAAAGACAA  
TGTTGTACATATTTTATTATGGAGATCATTTTAATAATTGTACACATTATTTTAAATGTGATGATAAATATAGT  
CCAGATTCATGTTTAAACAAGATTAATAATGTCCAGTTAATGAAAATGAAAAAGATATTAATGAAGAAGATGAAGTT  
GTAGGTTTTGTACAAAATGTAATATTACAAAGTTTAGATTCAATTAAGAGATTAAATCAAAGTAAAAATATATGT  
GATGGAATTATGTGTGATACATTTAGTAAATTTGCATTTTTCATTTTTCATTTTTCATTTTTCATTTTTCATTTT  
TTCGTATTTTATAAATTTACACCATTAGGAATATGGTTAAATAGAAAAGGTTTAAAGAAAAATAAGCTAGATAT  
GATTATTATGAAGAATCACCACAACAATTATTAGAAAATAATAGTAAACCTGTTCAAAGAAATATGCAAAATGGA  
AGAATTAGAATAGCTTATCAATCA

CCTAGG

## PVX\_096925

GGTACC

ATGAAAAATAAGATCATTTAATAGAAAAATATAAGAATAGATGCAATACCTACTTGTCTAGAAATATATTTAGT  
GGAAAATGTGATCATCCAAGTTTTTATTATTATTTTGTATTAGCACAAAGATATTTAAGTGATTTAATAAGAAA  
GAAAGTACAATAAATGTTGCACATGCTTGTAATTTTAAATTATTGGATATATAAATTTGTATGGAATGGAGTT  
ATGTATAATAAAATATGAGTACATTTTATGAAGAATTAAAAGATGGTTCAGATAATGAAGATATTTGTAAAAAT  
TATATGGAAGATATAGATGAAAATACTTATGAATATATTTTAAATTGATAGATTTATATACAAATTTAAGTAAT  
TTATCAAAACCACATAATGGAATAAATGTCCAACAATTAACATGTTTTGATAGTTATATGCAATGTAAAGAT  
ACATGTAAAGGTGATGAAAATAAAATTTTGTAAATGAATTAGAAAATTTAGAAAAAGATATAATGTAGCAATG  
AAAAGTGTAATAATTTGTGTTGATGAACATAAATATTACCAAGTTTTCAAGATTCACCAATTGTTCCAGTATCA  
GTTATACCAATAATTATAACAAGTGTTATTTCAATTAATTTTAAATAATTAGTTGTAAATTTACACCATTAGGAAAA  
TGGATATGTCCAAGATCAAAAAGAGCTAAAAATGGAACAAAGAAAAATAAATCATGAAATGAATAAATCACACAT  
ACTCCTGGTTATCAAGATATGTCTTATTATTAGTTAGTTATCAAAGTCCAAATCCTTCT

CCTAGG

## PVX\_097525

GGTACC

ATGGCAGCAAGTACAGGAAATAGTTGGGATGAAGCATTATTACATTTACCAGCATATCAAAAATATAAAGAATTT  
GATTCAGTAGATATATCAAAAGAAACAACAGTCAATGTAATAATTTAGGATCAAAAGAAGAAAGTGATAAAACA  
TTATGTAAGAAAATAGCACAAAATTTAAGAAAATTATCAACATTACAAGGAGATGAATTAATAAATGGTTGTTAT  
TATTTTCAACATTGGTTTTATGAACAAATAGCTAAAAATATTATGATGGAAAAATAAAAAATAATAATATCAT  
GTAGGTGAAACATTATTTGATATAAATTGCATTATTTATTTCAACATATCCAAAATTAGAACCATGTAGATGTTAT  
GTTAGTGGAAAACCAGAATATTGGGAAGAAGAAAAATATTTACATGATTATTTTAAAAATTATCAAGATATAAAA  
TGTAAGTAATAGTTCAAAAGATAGATGTGAAAAATATATACAATATGTAACATATATTAATAGATTATTTCCAGCT  
AAAGAAGATACATGTTGTGATGAAGGAGAATTAATTGAAGATTTTGTAAACCATATTTTAATTGTGAAAAATAAA  
TTTTCAACCAGAAAAATTTGTTAACACAATTAACACAGAATTACAAAGTTTAGGAACAAAAGCTGAAGCACCAAGA  
GAAGGTGGAACAGTTGGAGGTGTTGTAGATGTAAAGCAAAACCAGGTGCAGCTGAATCAGAAGGAGCAGAAAGT  
GGTATACCAAAACCAGCAGCTGCAAAACCAGCTCCAGCAAAACCAGTAGCTACATCACCAGCACCAAGTGAAAGA  
GCACCAGCAAAACCAGTTGCTGCAAAACCAGCTGCAACAAAACCAGCTACAACAAAACCAGCAAAAGAAGATCA  
GAAGGAGAAGATCCAGCTGGTGCAAAACCAGTAGCAGCTAAACCAGCTCCAGGAGAAGCTGTTCCAGCTAAACCT  
GTAGCTGCAAAACCAGTTGCAACAGAATCAGCTGCACCAGAAAGAGCACCAGAAGCACCAGAACCAGAAAGAAAGT  
CAACCAGAAATACCAGCTAGAGAAGTACCAGAACAAGCTGTTGTAGAAACAGCAGAAAATTACACATGAAGAA  
TCATTAAGTCCACCACCAATGGAAGGTTTCAAGAACAGTGTTCAGAAGTAAGTTCATATAATTCAGAATTAGCT  
AGTAATGGAGTTCCATTAACAATAGCAGATAGTCCAAATACATTAGGTACAACAAATGAAGAATTAGATTCAAAT  
TTCTTTAGTAATATAATAATGGCTGTTGCAGTATTAGGAACAATATTTTCTTATTTTATTATAATAGATCAGCA  
AGATTAGAAAGTAGTAGTAGAAAGAAAAACAAAAGAAAGGAAAAATATTCGAACATAATTATTATGAAGAATAT  
GAAAAAGAATTACCAATGTATGATAGTGAAGAAACATTTGTAGATTTCAGAAATGGATAGATTATATTTAAATTAT  
CATCCAGATCAAGATAGTTATTAT

CCTAGG

## PVX\_107235

GGTACC

ATGGCATTAAAGTTCTGAAAAGAATTTGGGTTGAAGTATTACAAAATTTACCTAGTTATAAAGAATATGAAAAATTA  
GATAAAGTTGATATTAAAAATGAAAATAGTTCCATTGTAATGATTTAGGAAGTACAGATGAAGGTGATAAAACA  
TTATGTAAGAAAATAGTTCAAAATTTAAATCAATTAAAGTGCATTAAAAGATGATGAAAATTTAGATAATTCATGT  
TATTATTTTCAACATTGGTTTTTCGATAATATAGCTAAAAATATTATGATGGAGATGAAGAGGTAATAATTAT  
CCAGTTGCAGAAAAATTTGTATAATATTGTTAGTGAATTAACCCAGTAAGTTCAAAAATGGAACCATGTAAATGT  
TATGAATCAGGATATCCAGATGTATGGAAAGAAGAAAAACATTTACATGATTATTTTGAAAATCATAAAGATATA  
AAATGTAATGATAGTGATAAATCAAAATGTGAAAAATATATACAATATGTTACATATATTAATACATTATTTCAA  
GAAAAAGTAGATAAATGTTGTGATGGAGAAGATTTAGATGAATATGGTTTTTGTGAACCATATTTTAAATGTGAA  
AATAAATATTACCACAAGATTTATTAGCACAATTAAAGAAAGAATTACAAGAATTAGGAAAGAAAGCAGAAGCT  
CCAAGAGATGGAGGTACAGGAGCAGTTGAAGCTGGTAAAGCACCCAGGAAGTGGTGTGAAGAAAGAGAAAAGAAA  
ACAAAAGAAGAAGTAACAGCAGAAGCTACAGGAAAAGAATCAAAAGAAAAATTGGTTGCAGGTGAAGTACCAAAA  
GAAAAAGCAGCTGATAGTTTAGCTCAATCAGCATTAGAAAAACAATACCAACACAACCAGCTGTTCAAGGAAGT  
GTAGGTTTAAACCAGGAGAAAGTGAATCAAGAGAAGAACCAGCATCAGCTAAATTGGTTGGTAAAAAACCA  
GAAGAAAATCCAATTGCACCAGAAAGTGGAGGTGCTAAACCAGCACCATCAGAAGGAGCACCAGCTAAACCAGTT  
GCTACAAAACCACCAGCAGCTGGTCCAGTTGCAGTAGAAAGTGAACAGTAACACCAGCAATGGCTGAATCAGGA  
AAAGCTAAATTGAGAGAAACAAAACCTGCTCCAGCTAAACCAGTTGCAGCTAAACCAGTAGCTAGTAAACCAGAA  
ACAGAAAAAGCAAAAGAAATTTGTTGCTGAAAAAGAAGCAACAAAAGAAATTTGAGCTGAAGAAGAAGCAACTAAA  
GAAACTTTAGTAGAAGAAGAAGCACCCAGAAGAAGTTGTAGATGAACCAACAATACATTACAACCAGAAGAACCA  
TTAGGACCACCACCAATAGAAAGTGTGTAACAAGATGTTTATGTAATTAGTTCACATAATACAGAACCAGCTTCA  
AATGCATTACCATTAAACAATTACAGATACACCAAATACATTAGGAACAGCAGATGAAGGTTTAGATAGTAATTC  
TTTAGAAATATAATAATGCGAGTTGCTGTATTAGGTAAAAATATTTTCTTATTTTATTATAATAGAAGTTCAAGA  
TTAGAAAGTTCATTACGTAAAAAGAAAAGAAAAGGAAAAATTCGAACATAATTATTATGAAGAATATGAA  
AAAGAATTAGAAATGTATGGTTTCAGAAGAAACATTTTAGATTTCAGAAACAGATAGATTATATTTAAATTATCAT  
CCAGATCAAGATAGTTATTAT

CCTAGG



## PVX\_108770

|       |                                                                               |
|-------|-------------------------------------------------------------------------------|
|       | M F D L E G G G T Q V E A D D E T I S E S                                     |
| 1.    | <u>GGTACC</u> ATGTTTGATTTAGAAGGTGGTGGAACACAAGTAGAAGCAGATGATGAAACAATATCAGAAAGT |
|       | T I Q G Q R I I F E H L P A Y I F E Q K L K E                                 |
| 70.   | ACAAATTC AAGGACAAAGAATTATATTTGAACATTTACCAGCTTATATTTTGAACAAAAATTAAAGAA         |
|       | D A T D N N F S G Y Y N V V K H I S E R Y G W                                 |
| 139.  | GATGCAACAGATAATAATTTTTCAGGATATTATAATGTAGTAAAACATATATCTGAAAGATATGGATGG         |
|       | G N D L F K K L S R N I S L V H D S Y I E G D                                 |
| 208.  | GGAAATGATTTATTTAAAAAATTATCAAGAAATATTAGTTTGTACATGATAGTTATATTGAAGGGGAT          |
|       | E F N R K R C Y D L N Y W L Y D N V Y K N L E                                 |
| 277.  | GAATTTAATAGAAAAAGATGTTATGATTTAAATTATTGGTTATATGATAATGTTTATAAAAAATTTAGAA        |
|       | S S N T N D T D Y F K D I S T K L Q G V W K N                                 |
| 346.  | AGTAGTAATACAAATGATACAGATTATTTTAAAGATATATCAACAAAATTACAAGGAGTATGGAAAAAT         |
|       | I V D N E F K D R P Y Q C Y P D K E L L L N M                                 |
| 415.  | ATAGTAGATAATGAATTTAAAGATAGACCATATCAATGTTATCCAGATAAAGAATTATTATTAAATATG         |
|       | G Y L Q E I K D L F D F Y E D Y N E M K K E I                                 |
| 484.  | GGATATTTACAAGAAATAAAAGATTTATTTGATTTTTATGAAGATTATAATGAAATGAAAAAGAAATT          |
|       | I A D T S G S C R R Y V E Y L K Q R I P V Y Y                                 |
| 553.  | ATAGCAGATACAAGTGGAAGTTGTAGAAGATATGTAGAATATTTAAAAACAAAGAATACCAGTATATTAT        |
|       | T W R D S C K V P E Y T C K R Y I D D Y M K Y                                 |
| 622.  | ACTTGGGAGAGATAGTTGTAAAGTACCAGAATATACATGTAAAAGATATATTGATGATTATATGAAATAT        |
|       | R P A S I V P D L S P W V V L T Y P G N K C Y                                 |
| 691.  | AGACCAGCAAGTATAGTACCAGATTTAAGTCCATGGGTAGTATTAAACATATCCTGGAAATAAATGTTAT        |
|       | A T V Y D I F V K A K E Q P K R N D G I Y K K                                 |
| 760.  | GCAACAGTATATGATATTTTTGTAAAAGCAAAAGAACAACCTAAAAGAAATGATGGAATTTATAAAAAA         |
|       | K M E K L E K L N P G K S L L N I S M G E G L                                 |
| 829.  | AAAAATGGAAAAATTAGAAAAATTAAATCCTGGAAAAAGTTTATTAAATATTAGTATGGGAGAAGGATTA        |
|       | R G S E F F I P G D H D D Y W L R L K W D I L                                 |
| 898.  | AGAGGAAGTGAATTTTTTATTCTGGTGATCATGATGATTATTGGTTAAGATTAAAAATGGGATATATTA         |
|       | L Y I T D D I T P P V L G I V G T L L I F W A                                 |
| 967.  | TTATATATTACAGATGATATTACACCACCAGTATTAGGAATAGTAGGAACATTATTAATATTTTGGGCA         |
|       | L Y K V R K R I R P N I N Y D D I K L L Y G S                                 |
| 1036. | TTATATAAAGTTAGAAAAAGAATTAGACCAAATATTAATTATGATGATATTAAATTATTATATGGAAGT         |
|       | E E S L N S S T D S Y D Y N N D Y D N D Y D N                                 |
| 1105. | GAAGAAAGTTTTAAATAGTTCAACAGATAGTTATGATTATAATAATGATTATGACAATGATTATGATAAT        |
|       | D D Y S D S N S S Y N L S Y A S T L D Y                                       |
| 1174. | GATGATTATAGTGATAGTAATAGTAGTTATAATTTAAGTTATGCAAGTACATTAGATTAT <u>CCTAGG</u>    |
