# Supplementary figures and images for: Ectopic Expression of Plasmodium vivax vir Genes in P. falciparum Affects Cytoadhesion via Increased Expression of Specific var Genes
Source: MDPI journal article supplement (doi:10.3390/microorganisms10061183), 2022-06-09

PVX\_050690

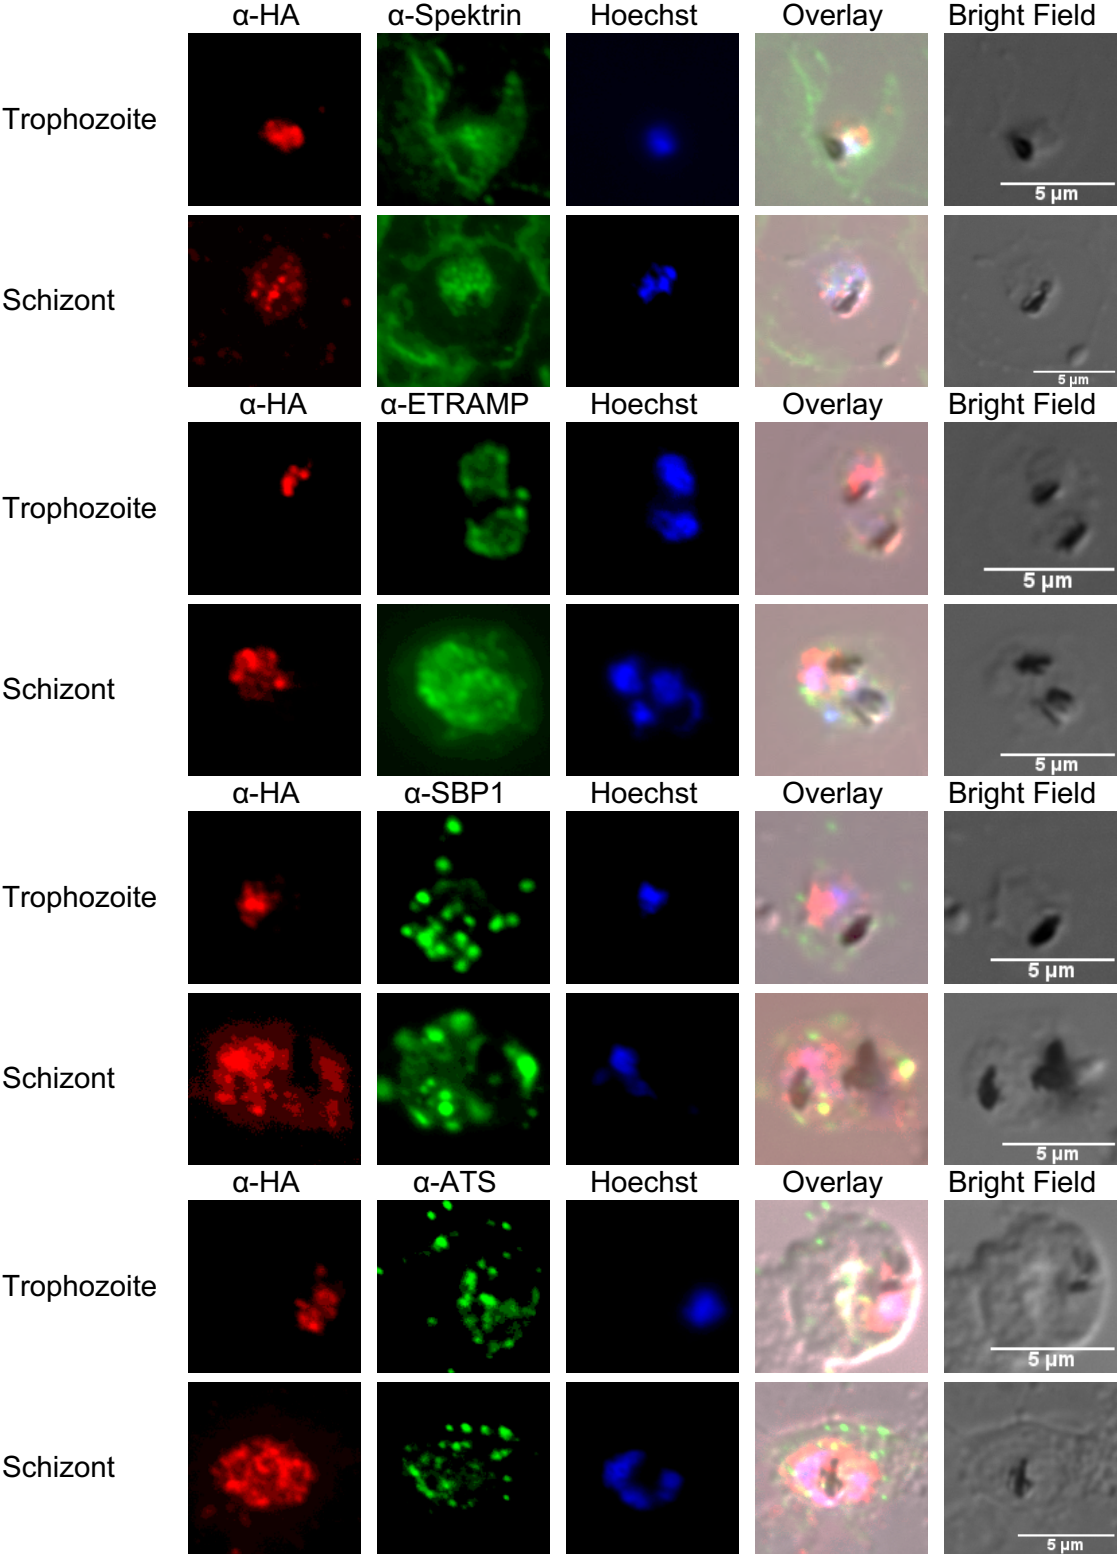

PVX\_060690

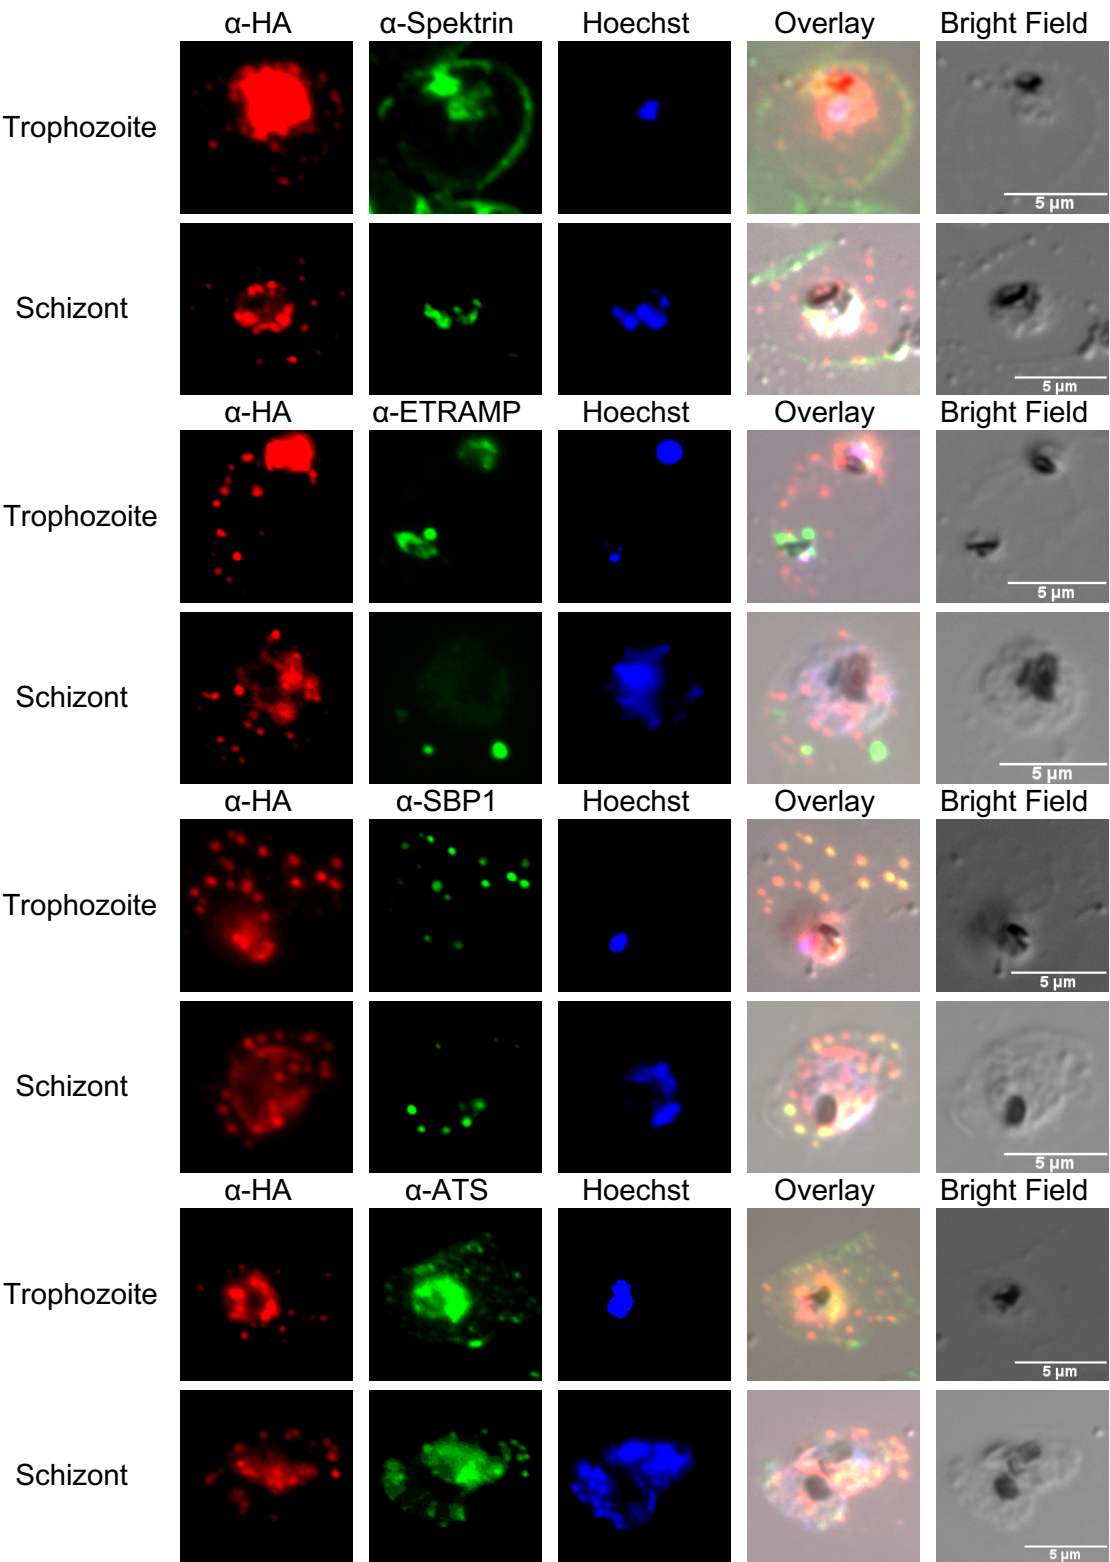

**PVX\_068690**

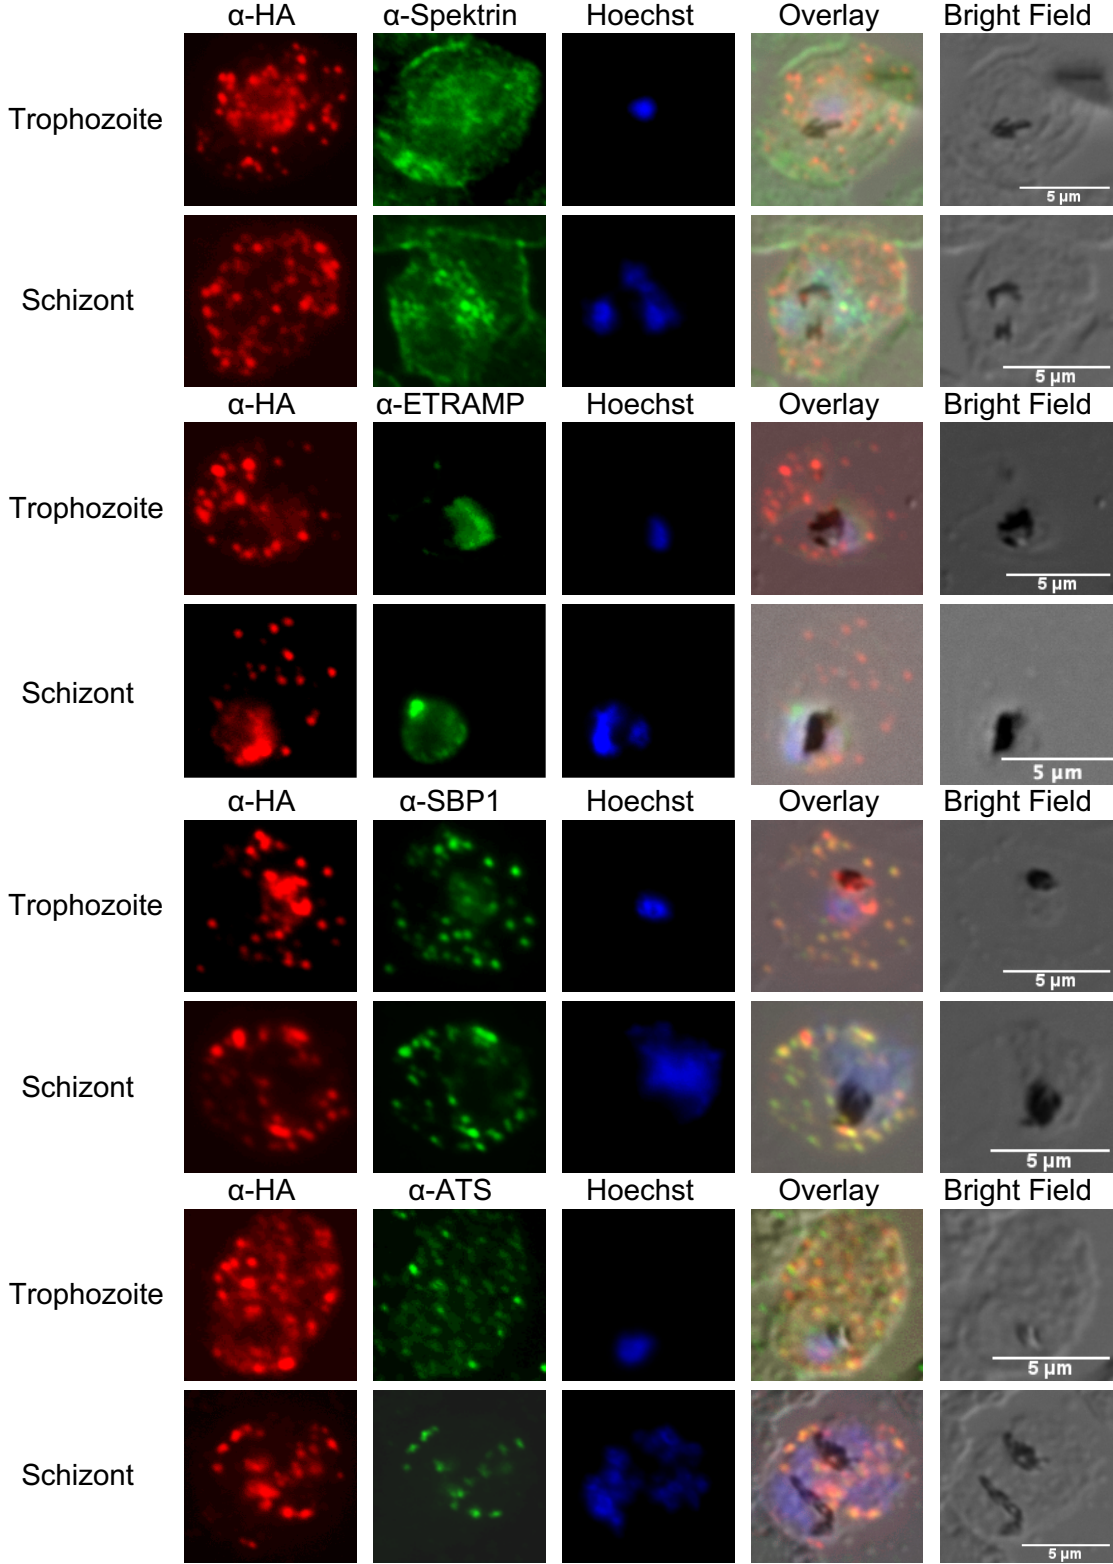

PVX\_093715

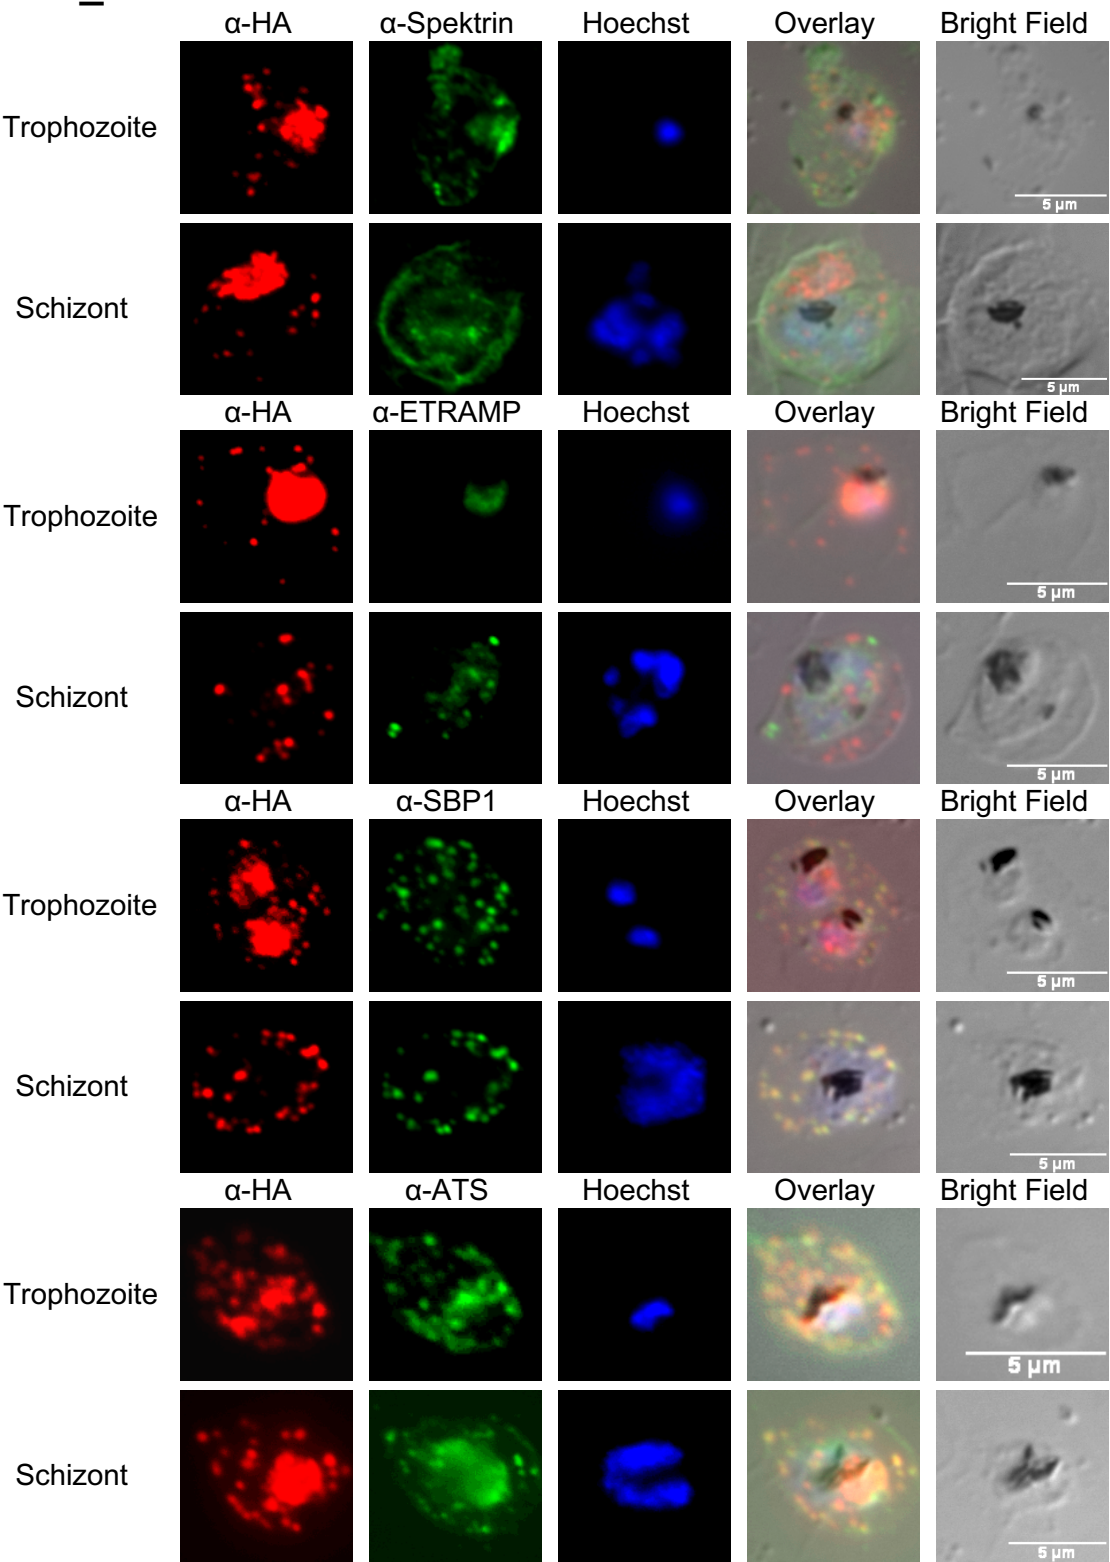

PVX\_096925

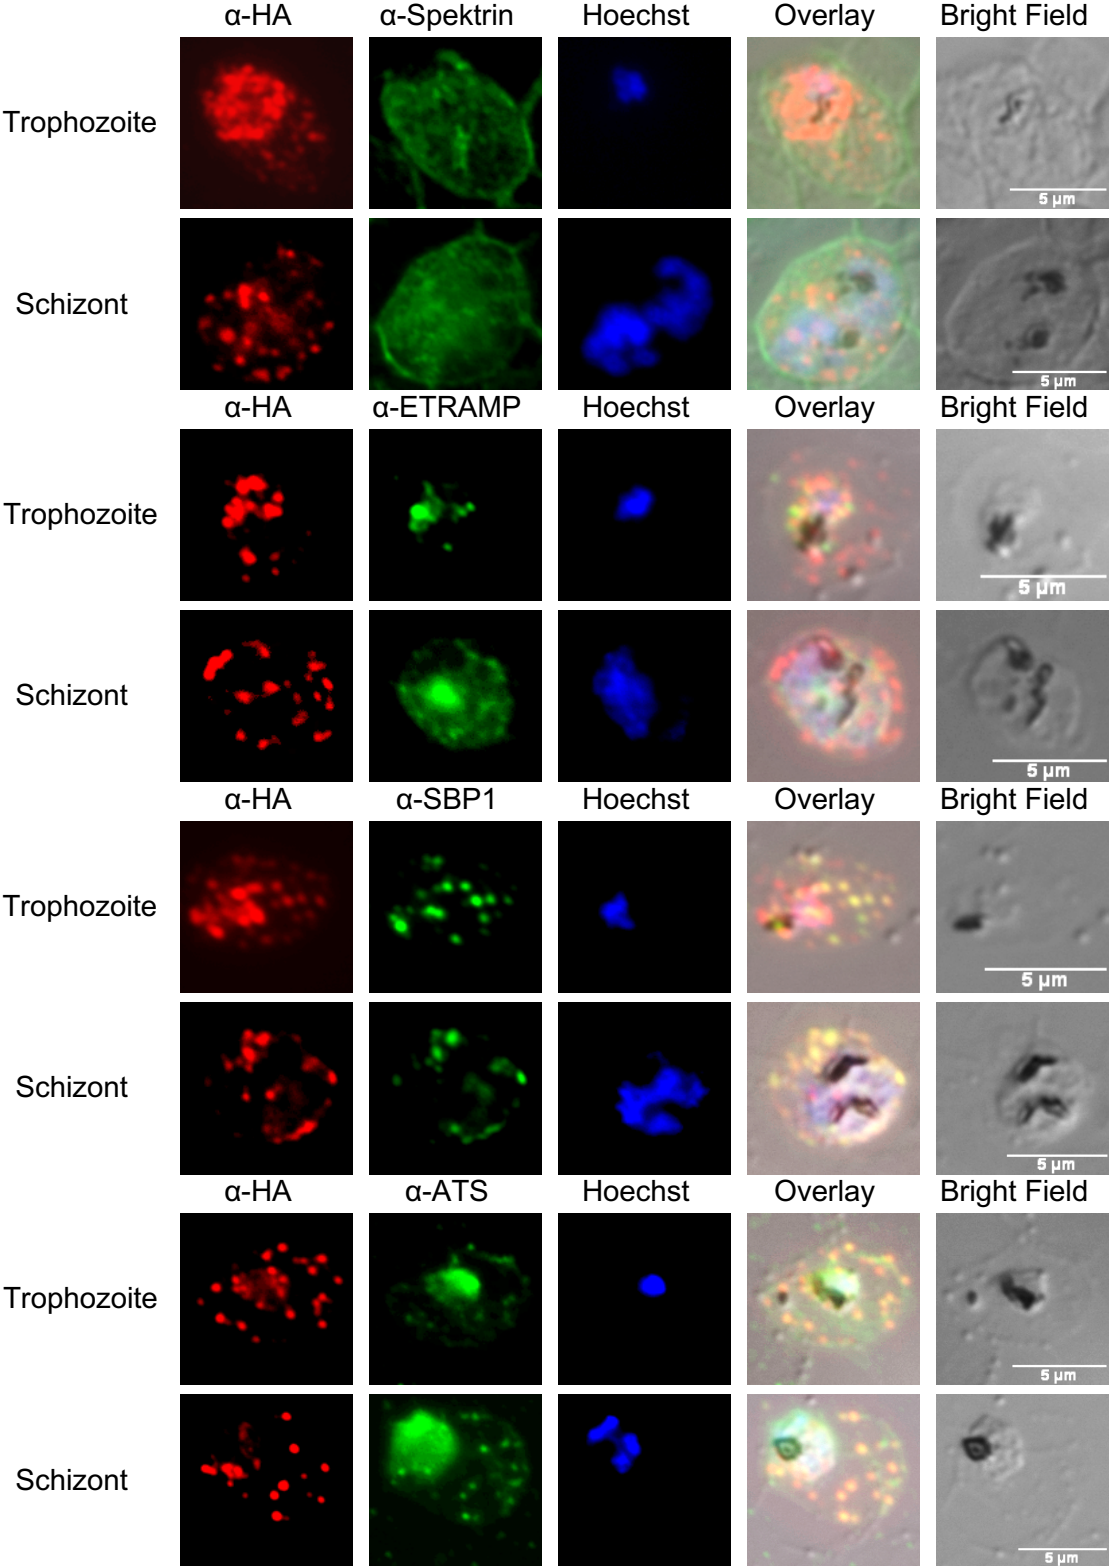

PVX\_077695

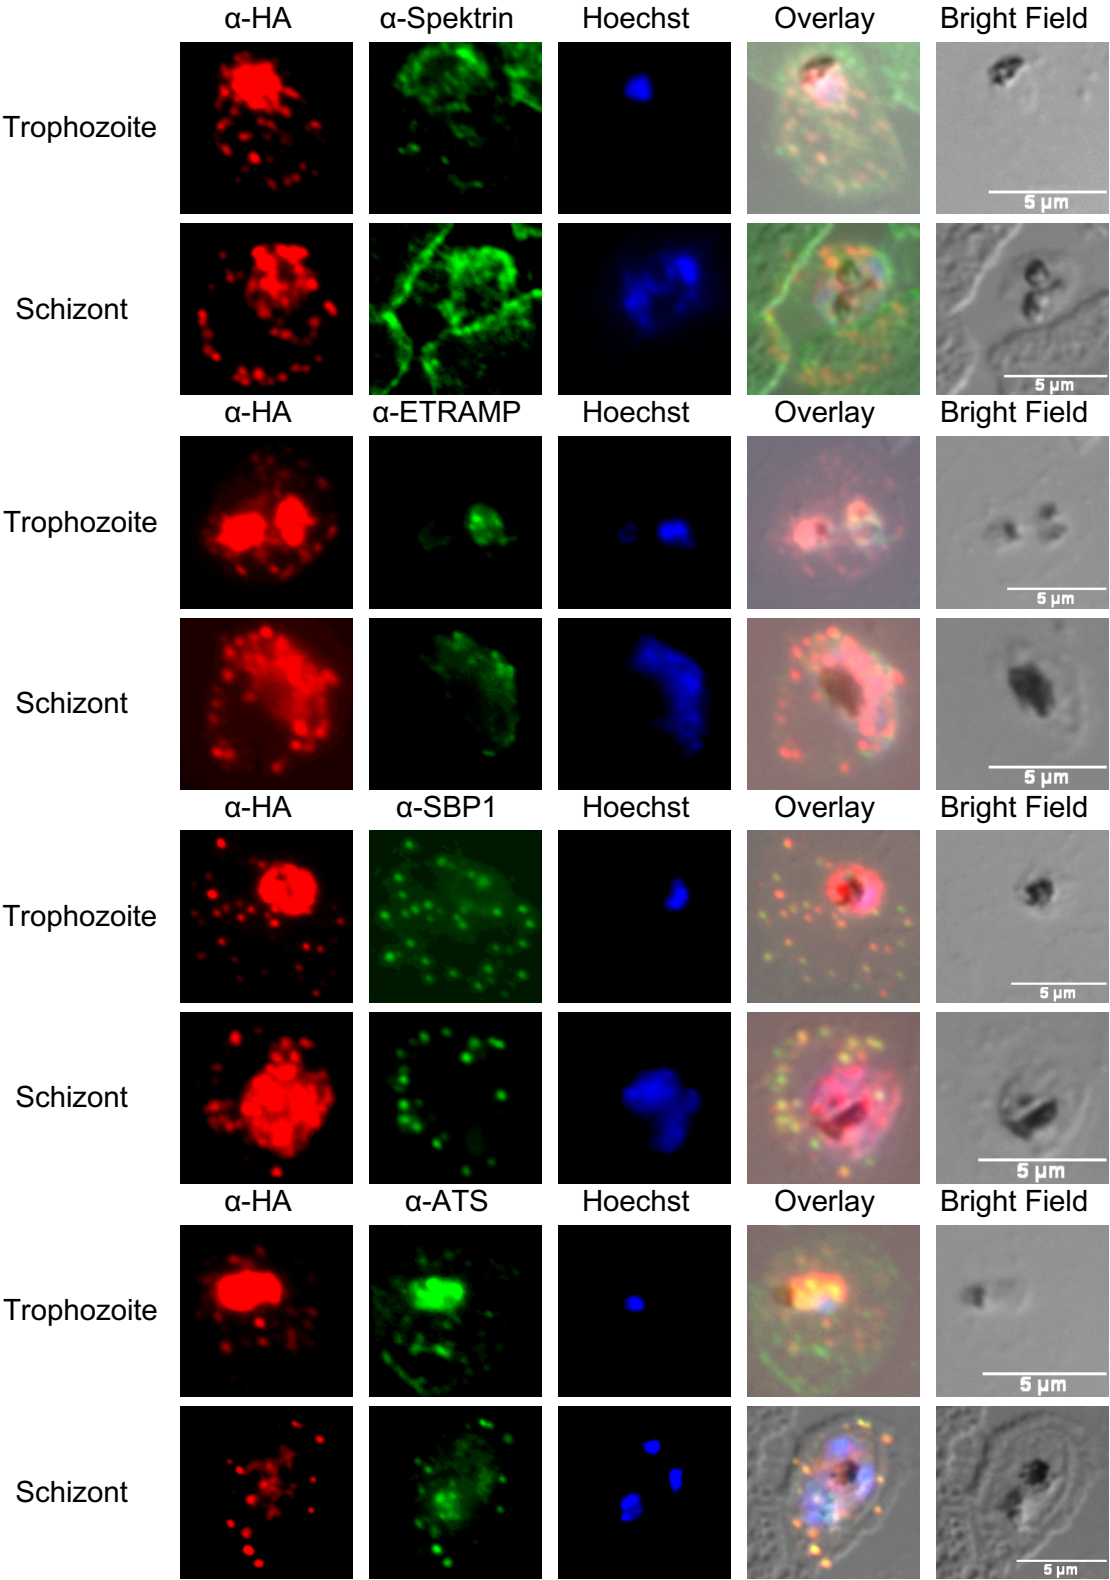

**PVX\_081850**

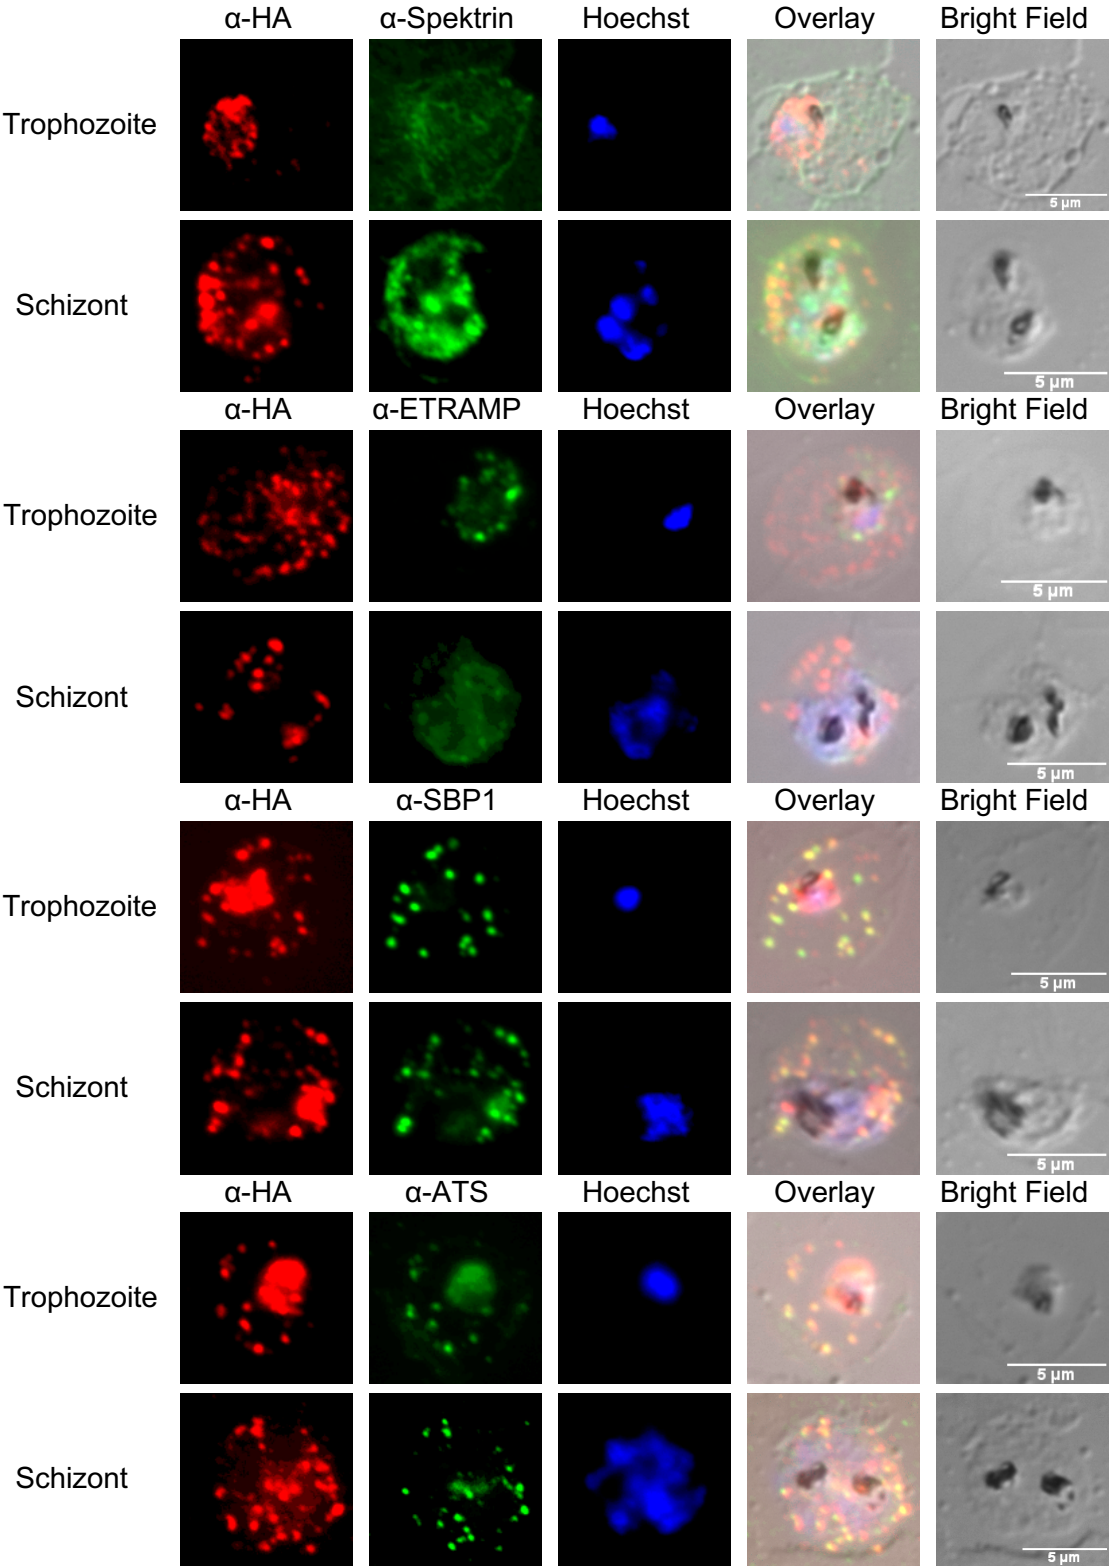

PVX\_097525

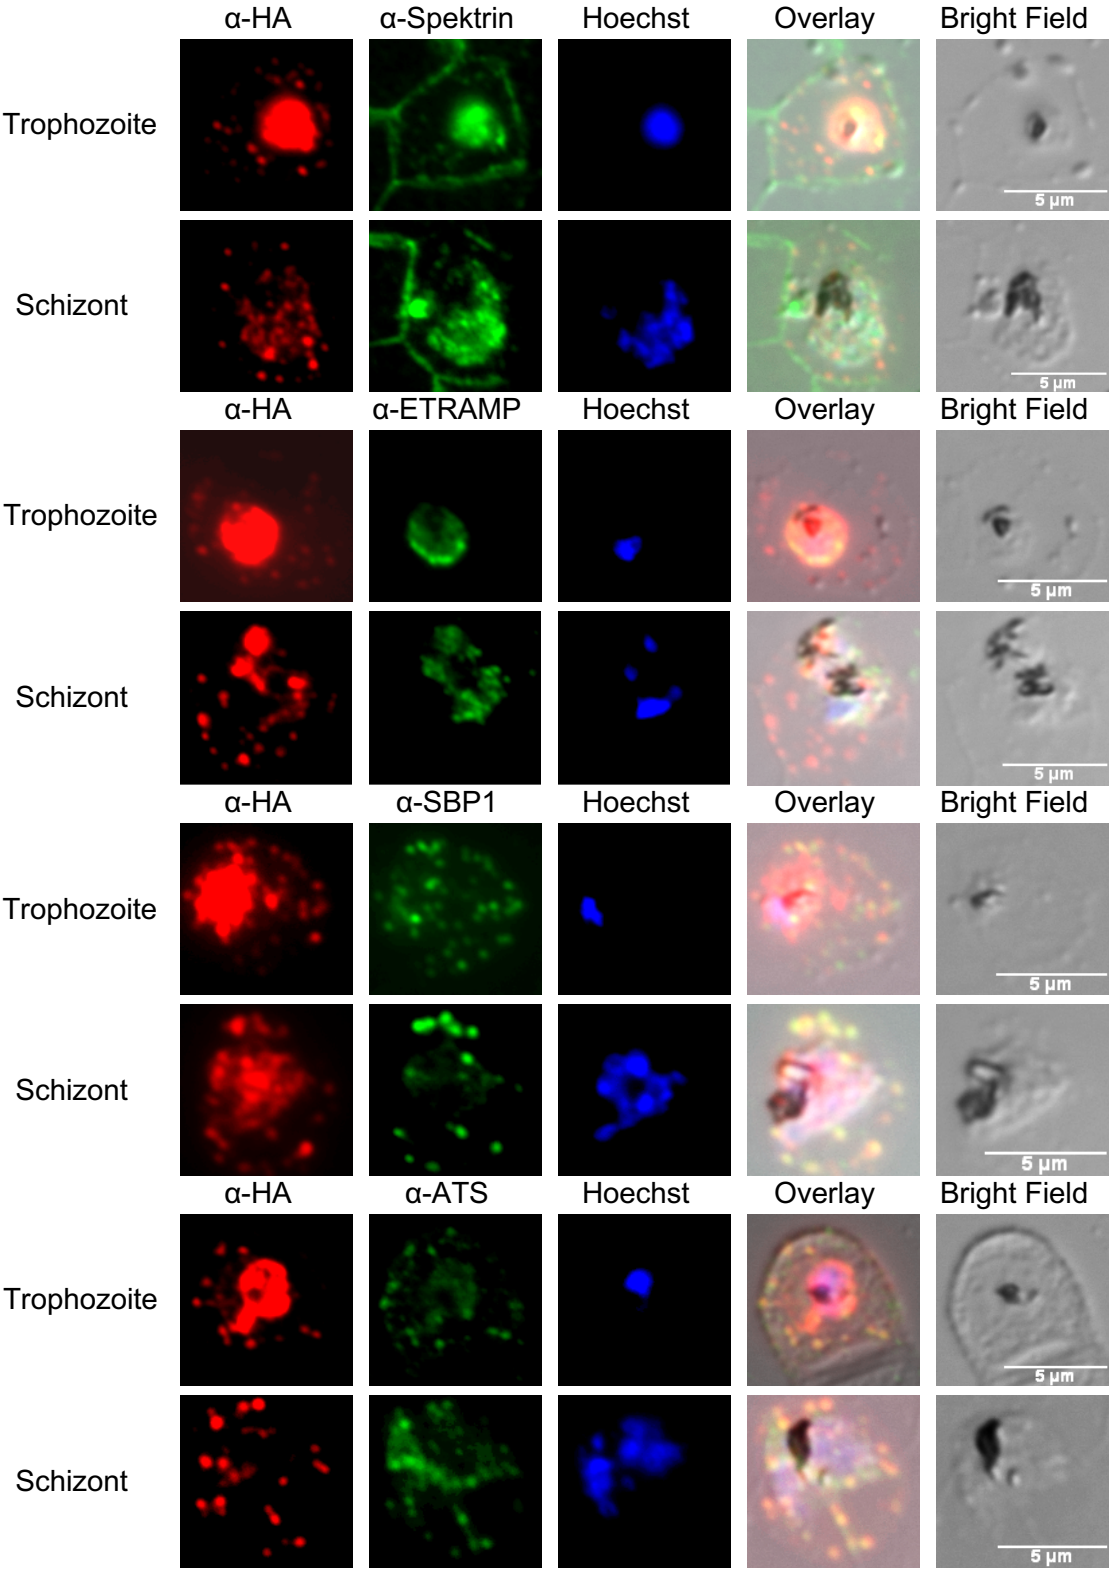

**PVX\_101560**

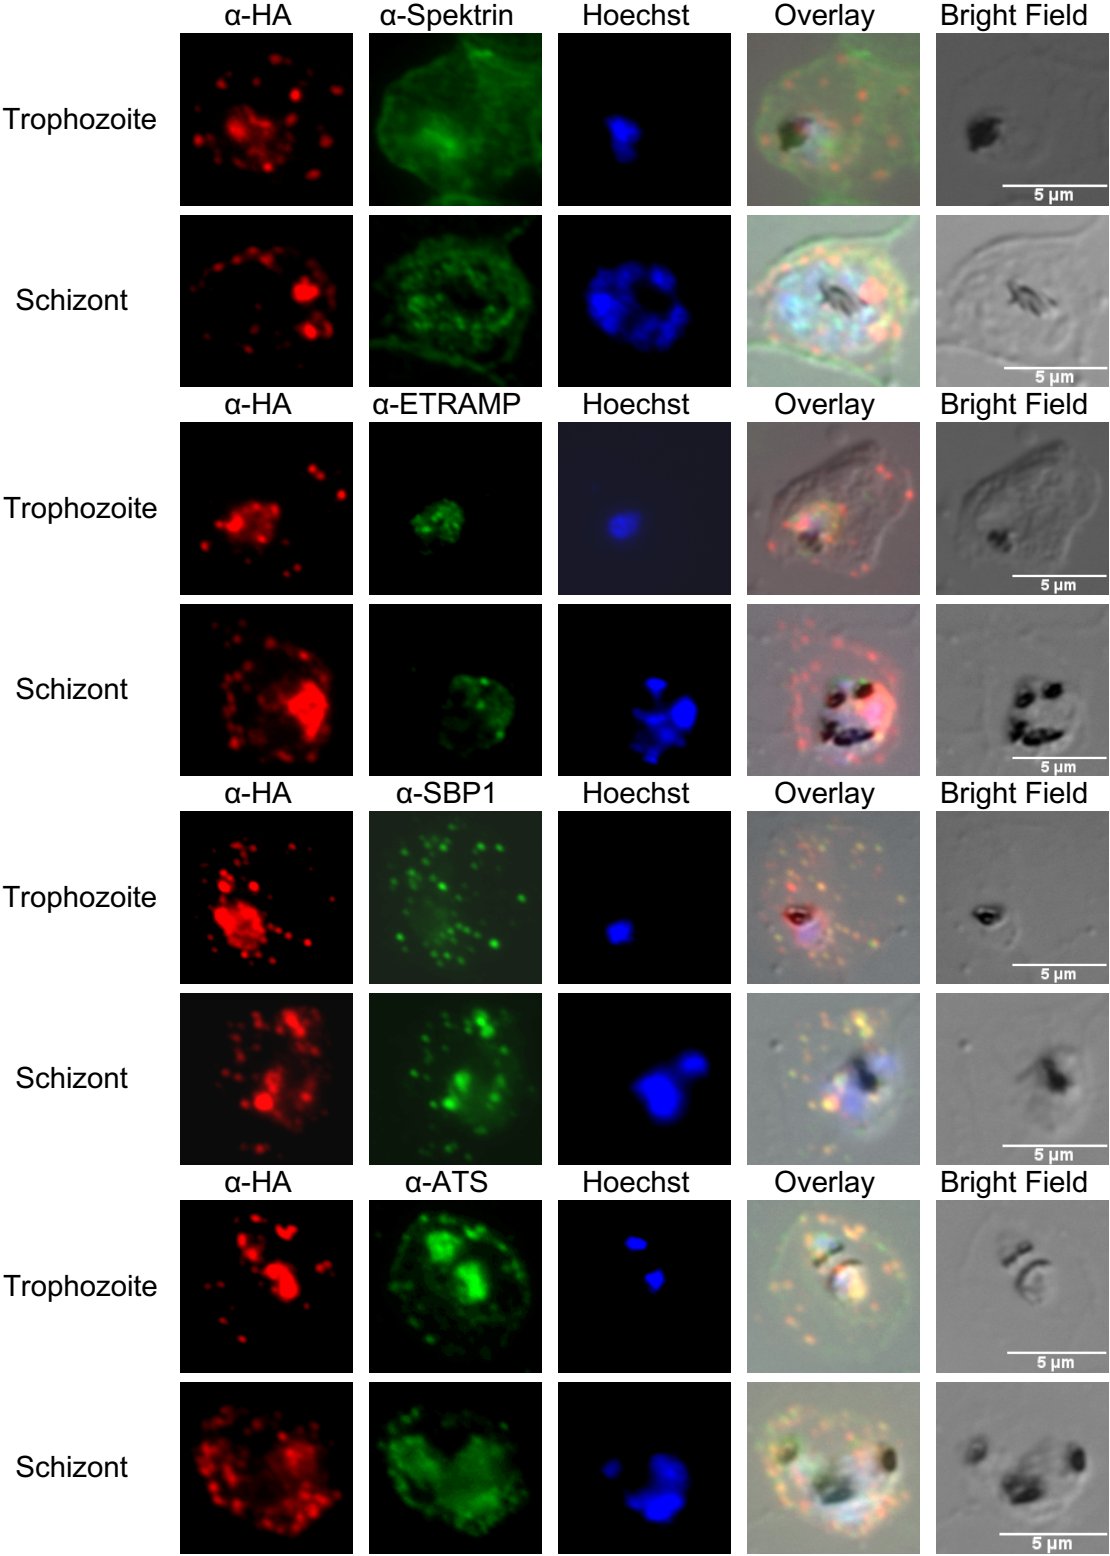

**PVX\_107235**

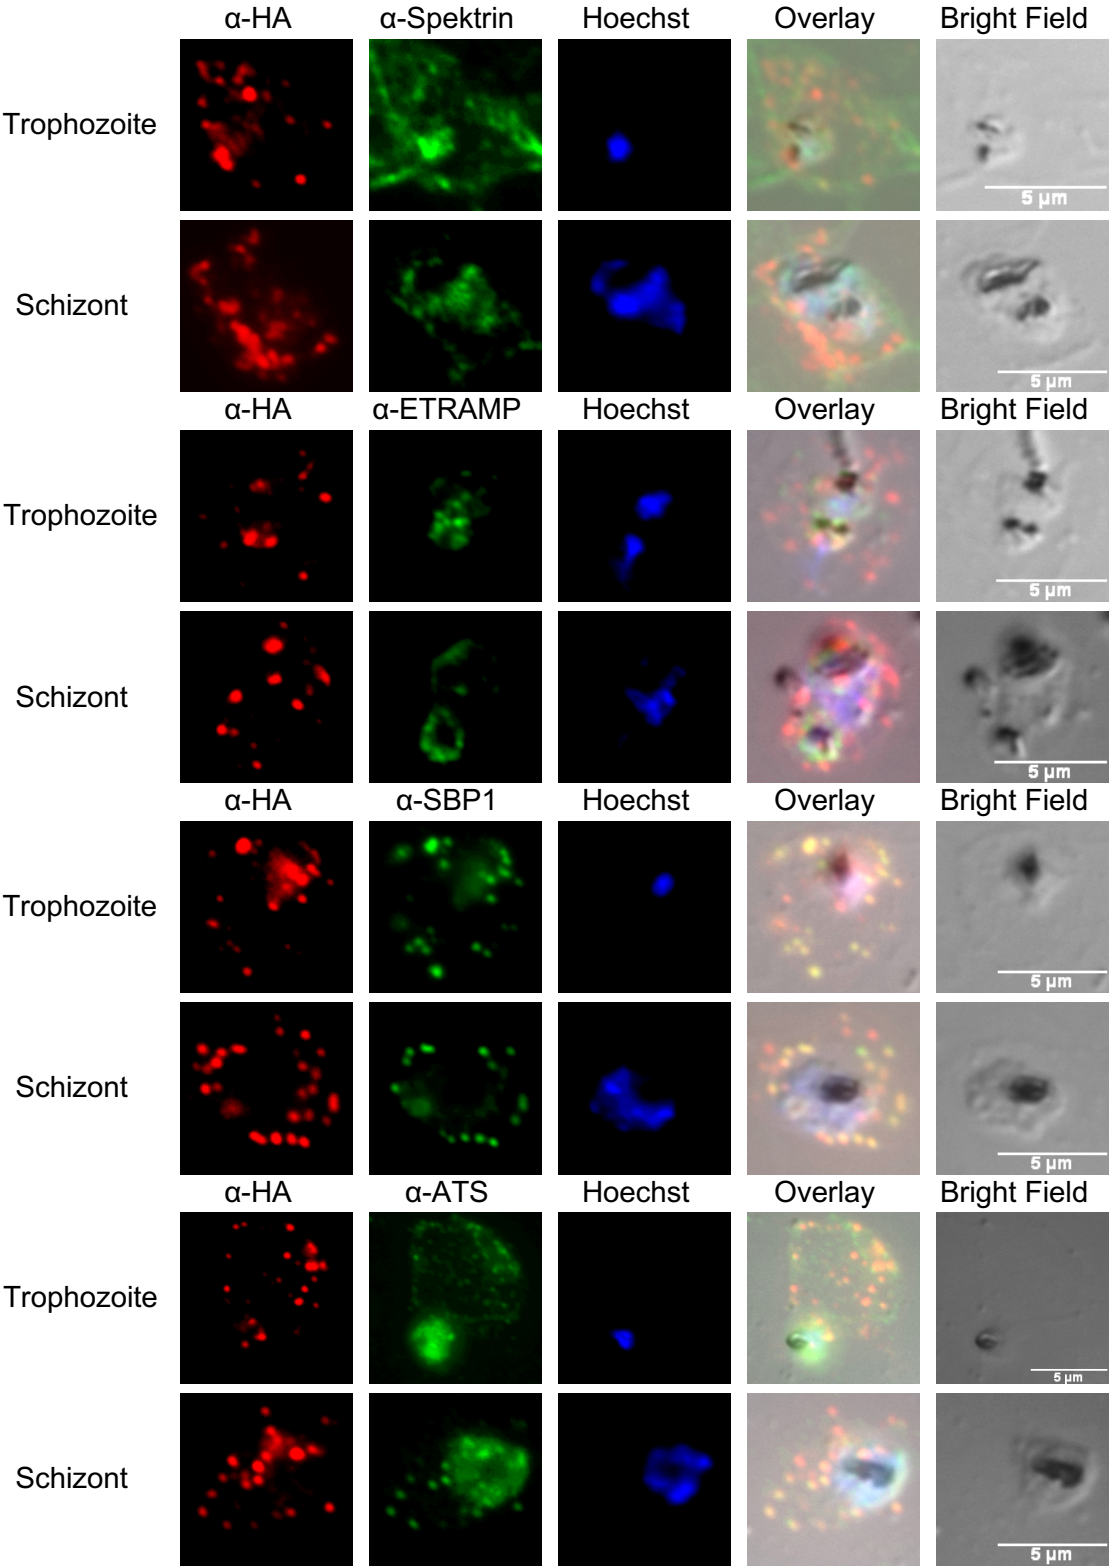

PVX\_113230

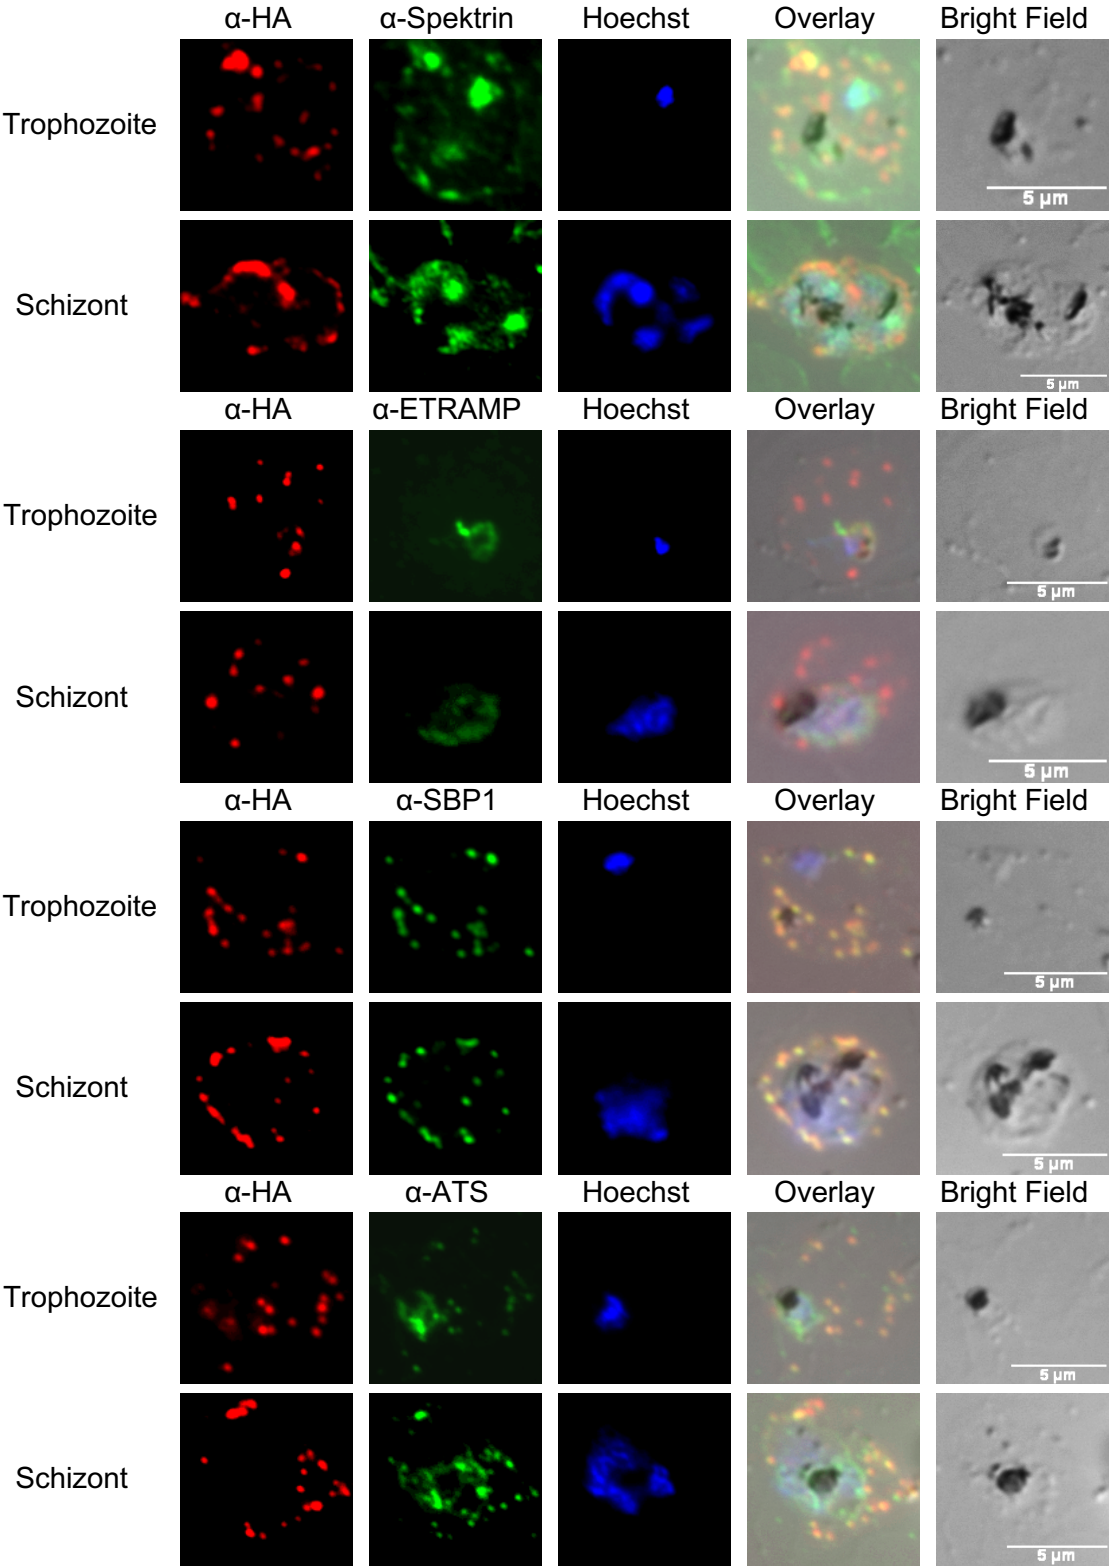

# PVX\_115475

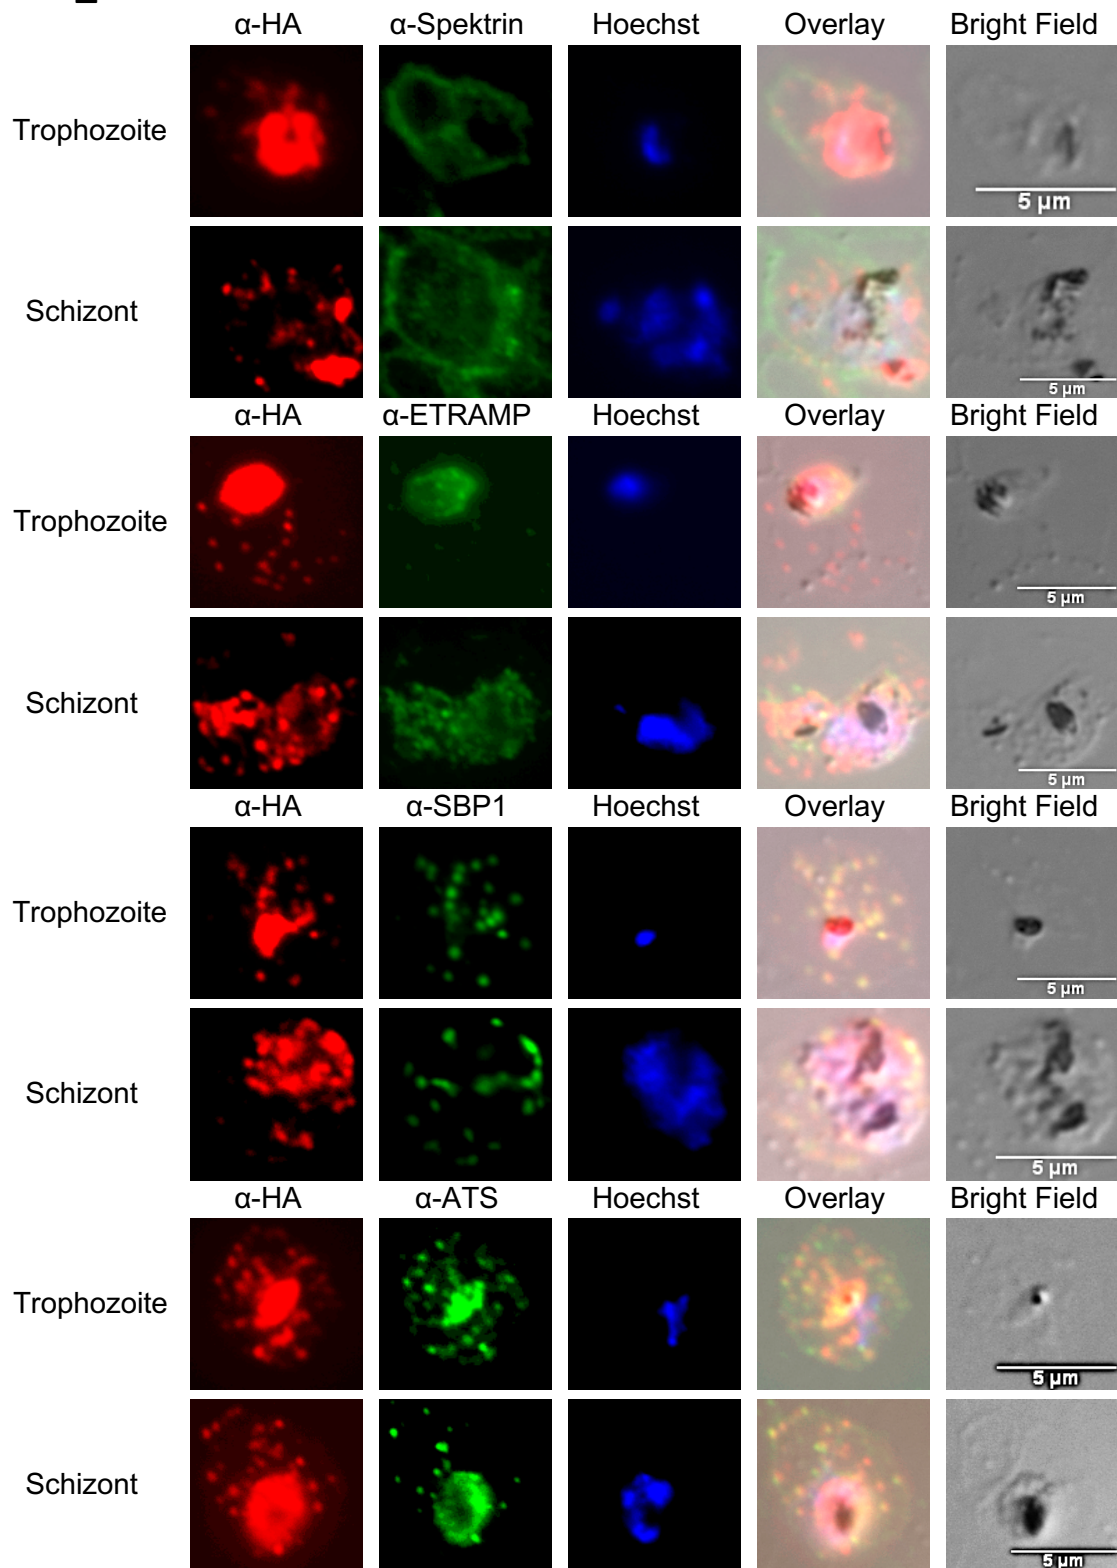

Supplement: s1 [file s1]
